# Supplementary material for: Selective inhibition of CDK7 reveals high-confidence targets and new models for TFIIH function in transcription
Source: PubMed Central journal article supplement — Genes Dev. 2020 Nov 1;34(21-22):1452–73. doi: 10.1101/gad.341545.120 (PMC7608751; doi:10.1101/gad.341545.120), 2020-11-01
Supplement: supp_gad.341545.120_Supplemental_Material.pdf [file supp_gad.341545.120_Supplemental_Material.pdf]

# Supplemental Material

## Selective inhibition of CDK7 reveals high-confidence targets and new models for TFIIF function in transcription

Rimel, JK<sup>1§</sup>; Poss, ZC<sup>2§</sup>; Erickson, B<sup>3,4</sup>; Maas, ZL<sup>1,2,5</sup>; Ebmeier, CC<sup>2</sup>; Johnson, JL<sup>6</sup>; Decker, T-M<sup>1</sup>; Yaron, TM<sup>6,7</sup>; Bradley, MJ<sup>8</sup>; Hamman, KB<sup>8</sup>; Hu, S<sup>8</sup>; Malojcic, G<sup>8</sup>; Marineau, JJ<sup>8</sup>; White, PW<sup>9</sup>; Brault, M<sup>9</sup>; Tao, L<sup>9</sup>; DeRoy, P<sup>9</sup>; Clavette, C<sup>9</sup>; Nayak, S<sup>10</sup>; Damon, LJ<sup>1,5</sup>; Kaltheuner, IH<sup>11</sup>; Bunch, H<sup>12</sup>; Cantley, LC<sup>6</sup>; Geyer, M<sup>11</sup>; Iwasa, J<sup>10</sup>; Dowell, RD<sup>2,5</sup>; Bentley, DL<sup>3,4</sup>; Old, WM<sup>2\*</sup>; Taatjes, DJ<sup>1,13\*</sup>

<sup>1</sup> Dept. of Biochemistry, University of Colorado, Boulder, CO 80303, USA.

<sup>2</sup> Dept. of Molecular, Cellular, and Developmental Biology, University of Colorado, Boulder, CO 80309, USA.

<sup>3</sup> Dept. Biochemistry and Molecular Genetics, University of Colorado School of Medicine, Aurora, CO 80045, USA.

<sup>4</sup> UC-Denver RNA Bioscience Initiative

<sup>5</sup> BioFrontiers Institute, University of Colorado, Boulder, CO 80309, USA.

<sup>6</sup> Meyer Cancer Center, Weill Cornell Medicine, New York, NY, 10065, USA.

<sup>7</sup> Englander Institute for Precision Medicine, Institute for Computational Biomedicine, Department of Physiology and Biophysics, Weill Cornell Medicine, New York, NY 10065, USA.

<sup>8</sup> Syros Pharmaceuticals, 35 CambridgePark Drive, 4<sup>th</sup> floor Cambridge, MA 02140 USA.

<sup>9</sup> Paraza Pharma, Inc., 2525 Marie Curie Montreal, QC Canada.

<sup>10</sup> Dept. of Biochemistry, University of Utah, Salt Lake City, UT, USA.

<sup>11</sup> Institute of Structural Biology, University of Bonn, Germany.

<sup>12</sup> School of Applied Biosciences, College of Agriculture and Life Sciences, Kyungpook National University, Republic of Korea.

<sup>13</sup> Lead contact

§equal contribution

\*corresponding authors

# Supplemental Fig\_1

**A**

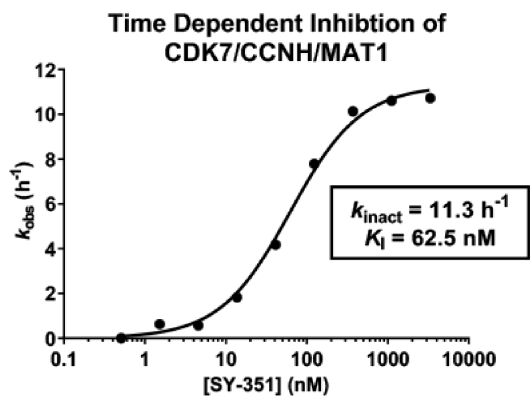

**B**

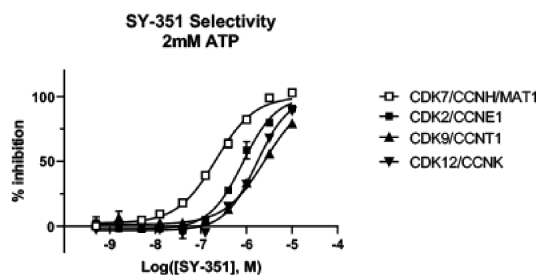

## Supplemental Figure 1. Additional details about SY-351.

(A) SY-351 is a potent and time-dependent inhibitor of active CDK7/CCNH/MAT1 with a  $k_{inact}$  of 11.3  $h^{-1}$  and  $K_i$  of 62.5 nM.

(B) SY-351 inhibition of active kinases CDK7/CCNH/MAT1, CDK2/CCNE1, CDK9/CCNT1, CDK12/CCNK with 2mM ATP. The best fit  $IC_{50}$  values are 205 nM, 988 nM, 2237 nM, and 1554 nM, respectively.

# Supplemental Fig\_S2

**A**

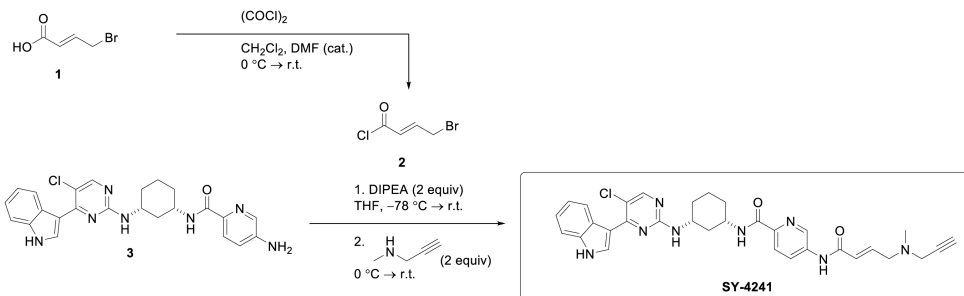

**B**

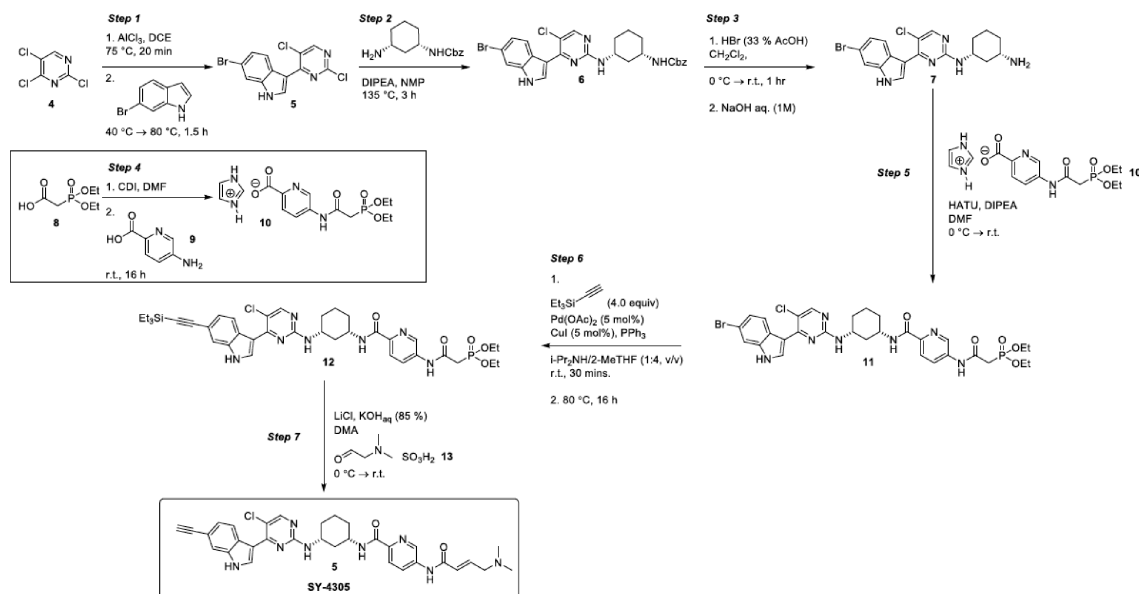

**C**

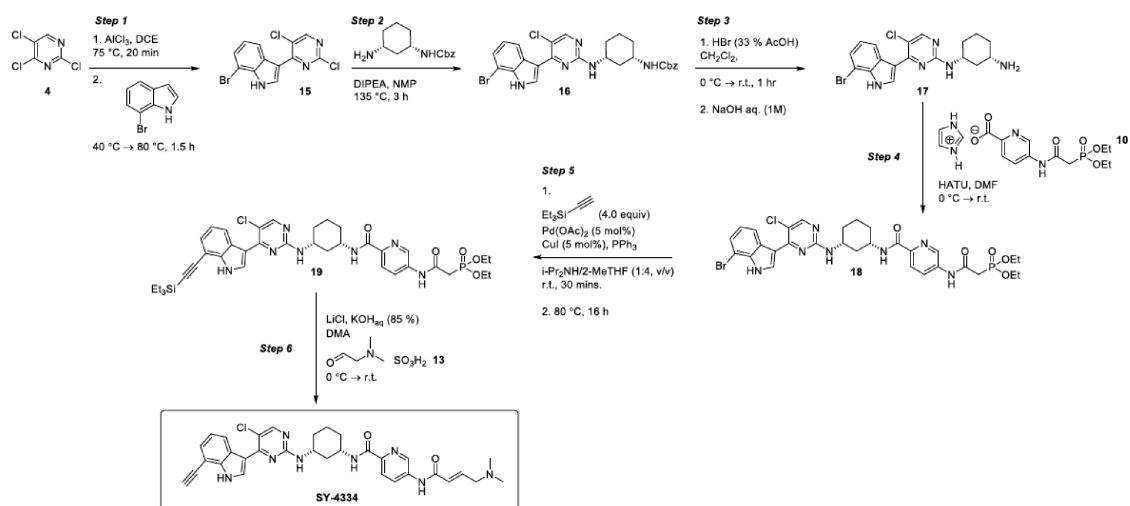

**Supplemental Figure 2. Chemical structures and synthesis of alkyne probes used in ABPP experiments.**

(A) Overview for SY-4241, (B) SY-4305, and (C) SY-4334.

## Supplemental Fig\_3

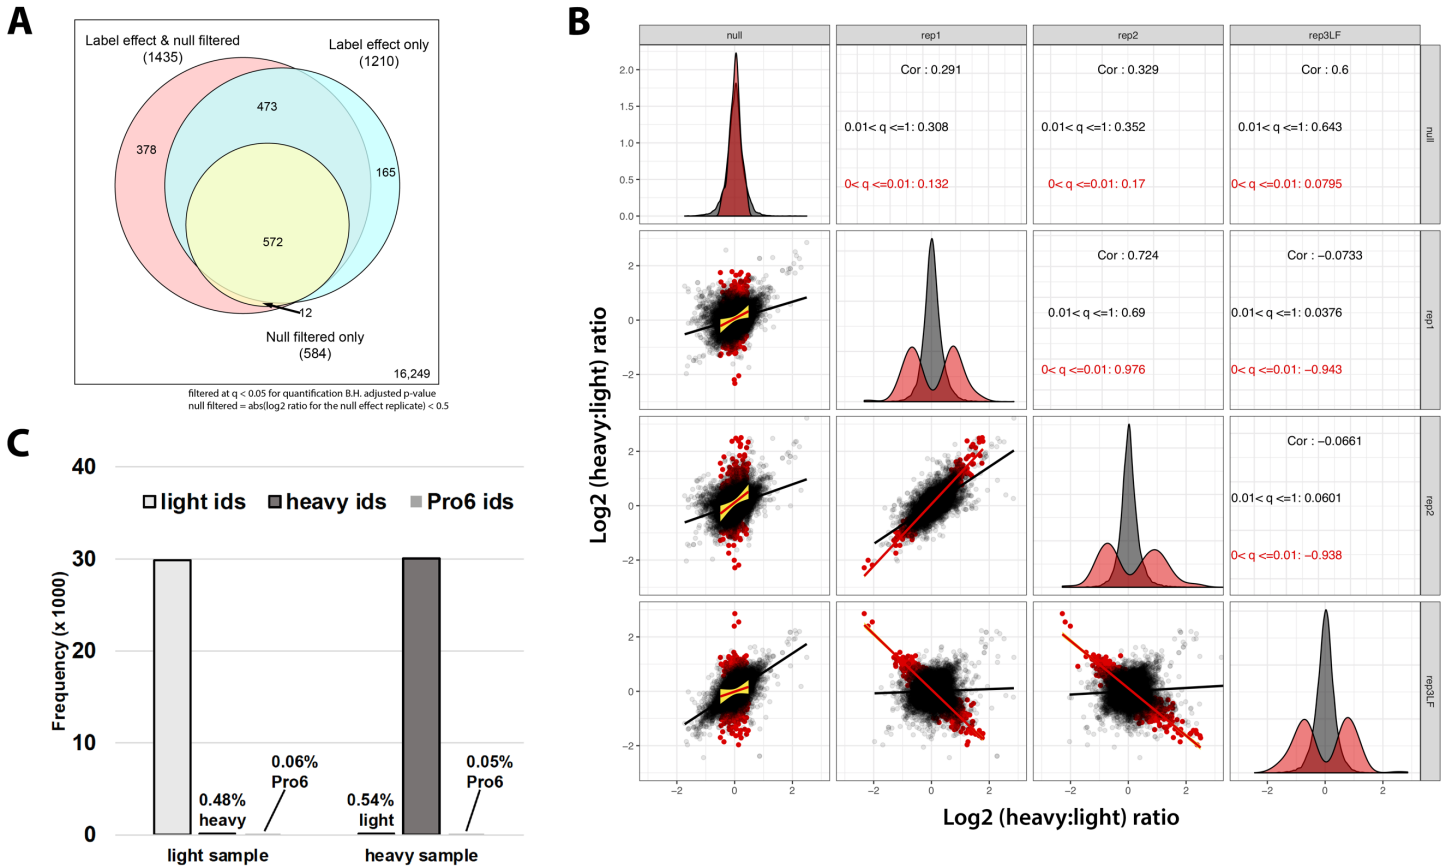

### Supplemental Figure 3. Improved modeling of SY-351 treatment effect with a two-parameter linear model.

(A) Two different linear models were tested, coded in R and based on the limma package (Ritchie et al. 2015). The “Label effect” (isotope effect) model incorporates an extra coefficient in addition to the drug effect coefficient to explicitly model systematic bias in the SILAC isotope ratios present prior to drug treatment. This provides improved modeling of the residual errors, and as a result, improved detection of significant phosphorylation sites changing with SY-351. In addition, we evaluated the effect of removing SILAC ratios showing large changes ( $|\log_2(\text{Heavy/Light})| > 0.5$ ) “null filtered” in combination with the two coefficient model “Label effect & null filtered” vs. “Label effect only”. “Null filtered only” is the simple model with only one coefficient for the SY-351 effect with large magnitude  $\log_2$  ratios in the null condition removed prior to testing.

(B) The label (a.k.a. isotope) effect captured by the coefficient  $\beta_{g0}$ , and the SY-351 specific effect captured by the coefficient  $\beta_{g1}$ , can be seen in scatterplots of the  $\log_2$  (heavy/light) ratios, as on-diagonal grey points, and red points, respectively, superimposed on scatterplots for each sample. The effect of the isotope-label flip comparison for differentially expressed phospho-sites can be seen as the negative correlation of red points when compared with the non-swapped conditions. The isotope bias effect can be seen as a non-zero correlations in the comparisons with the null condition (first column of scatterplots), and the superposition of these correlated sites in the flipped sample (rep3LF) comparisons. The on-diagonal panels show the  $\log_2$  (heavy/light) ratio distributions for phospho-site SILAC ratios found to be differentially expressed with SY-351 at  $q \leq 0.01$  (red) and those that did not reach this threshold at  $q > 0.01$  (grey). For each of the six sample comparison scatterplots in the lower left of the matrix, the significant (red) and non-significant (grey) phospho-site  $\log_2$  (heavy/light) ratios are plotted, and a smoothed linear fit to the points in each group (red and grey) is plotted to highlight the degree and direction of correlation. The Pearson correlation coefficients for each scatterplot are shown in the panels in the upper triangle, showing both the overall correlation (top of each panel) and the correlation for each group separately.

(C) Metabolic incorporation analysis of searches from heavy- and light-labeled HL-60 samples. In both samples, heavy and light modifications (see Methods) were searched, as well as Arg $\rightarrow$ Pro conversion. Data were analyzed from the evidence file and showed low levels of unmodified peptides in the sample of interest, suggesting isotopic incorporation into cellular proteomes was essentially complete, and proline conversion very low.

# Supplemental Fig\_4

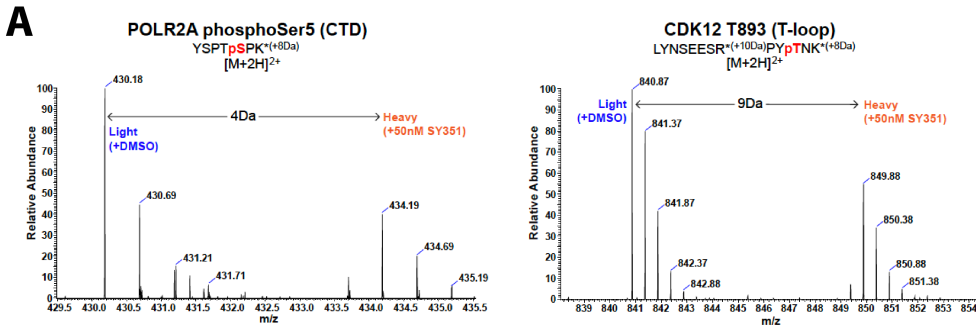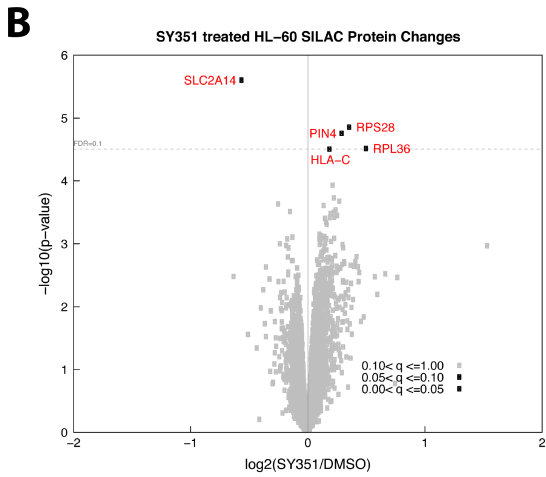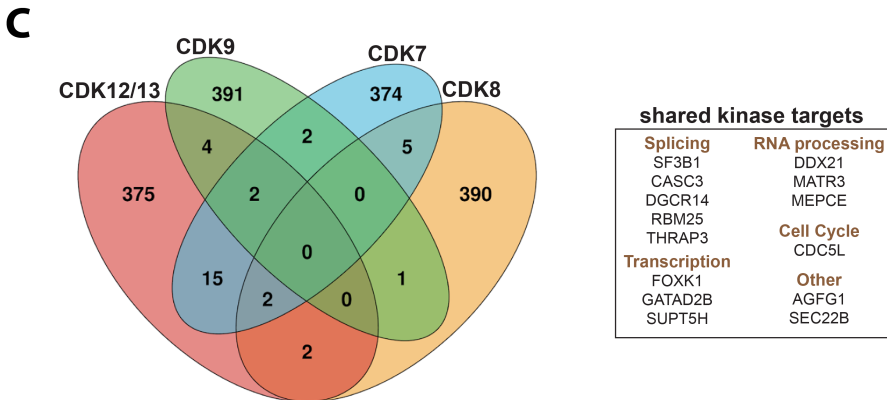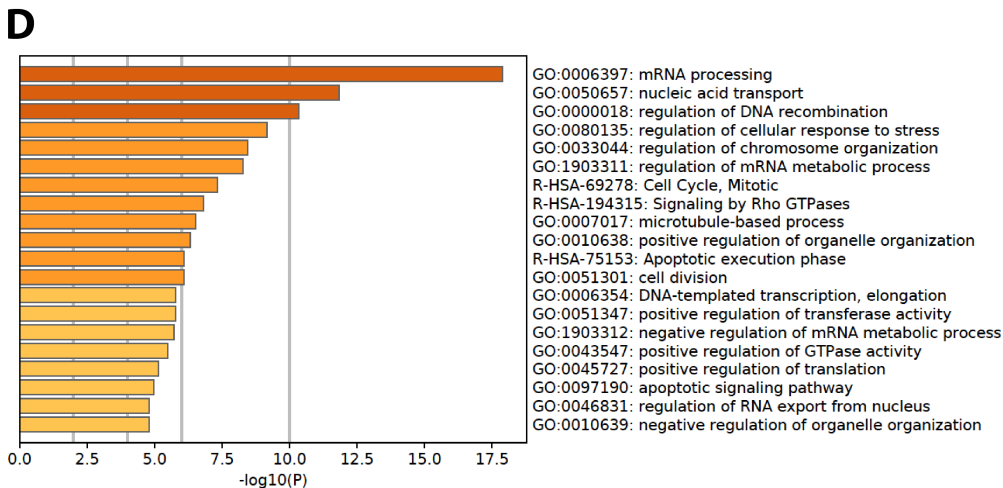

**Supplemental Figure 4. Few proteins change in abundance with SY-351 treatment; summary of phosphoproteins with significantly decreasing phospho-sites.**

(A) MS scans of key SILAC pairs identified in this study. The Ser5 repeat POLR2A is a recognized CDK7 substrate, and was identified upon inhibition with SY-351 treatment. The 4Da difference is reflected in the 8Da mass difference in the peptide pair, and accounted for by the +2 charge. T893 of CDK12 is a regulatory “T-loop” phosphorylation site, and the 9Da difference is reflected by the 18Da peptide difference, as there is a missed cleavage due to a C-terminal proline adjacent to an internal arginine, and accounted for by the +2 charge. Note that for both peptide pairs, the heavy sample was treated with SY-351, accounting for the reduced abundance of the heavy phosphopeptide. Also note that the ratiometric abundance of these peptide pairs was not recapitulated in the null sample, without SY-351 treatment, and that the Ser2 POLR2A peptide, which is not a generally recognized CDK7 substrate, did not show this decrease with SY-351 treatment (not shown).

(B) In parallel to the phosphoproteome experiment, we also performed SILAC proteomics to test whether SY-351 treatment led to protein-level changes. Statistical analysis for protein-level SILAC ratios was identical to the phosphoproteome analysis using the same two-coefficient modeling approach.

(C) Venn diagram showing phosphorylation sites shared or mutually exclusive for transcription-associated kinases CDK7, CDK8, CDK9, and CDK12/CDK13. For each kinase, the top 400 identified phosphorylated proteins, based upon the largest negative log-fold change values and  $p < 0.05$ , were used for comparisons, and the number of overlapping proteins was calculated for all combinations of samples. CDK7 targets identified here were compared with proteins identified as substrates for CDK8 in HCT116 cells (Poss et al. 2016), CDK9 in HCT116 cell extracts (Sanso et al. 2016), and CDK12/13 in IMR-32 and Kelly cells (Krajewska et al. 2019).

(D) Metascape GO and pathway analysis of phosphosites whose ratios decreased with SY-351 treatment ( $q < 0.05$ ). This analysis shows the top 20 enriched GO terms and pathways (see Methods). Note that the top enriched GO term is mRNA processing, and that multiple terms associated with RNA processing are present. For increased phosphosites, terms associated with mRNA processing were also enriched (not shown). “R-HSA” refers to Reactome pathway nomenclature.

## Supplemental Fig\_5

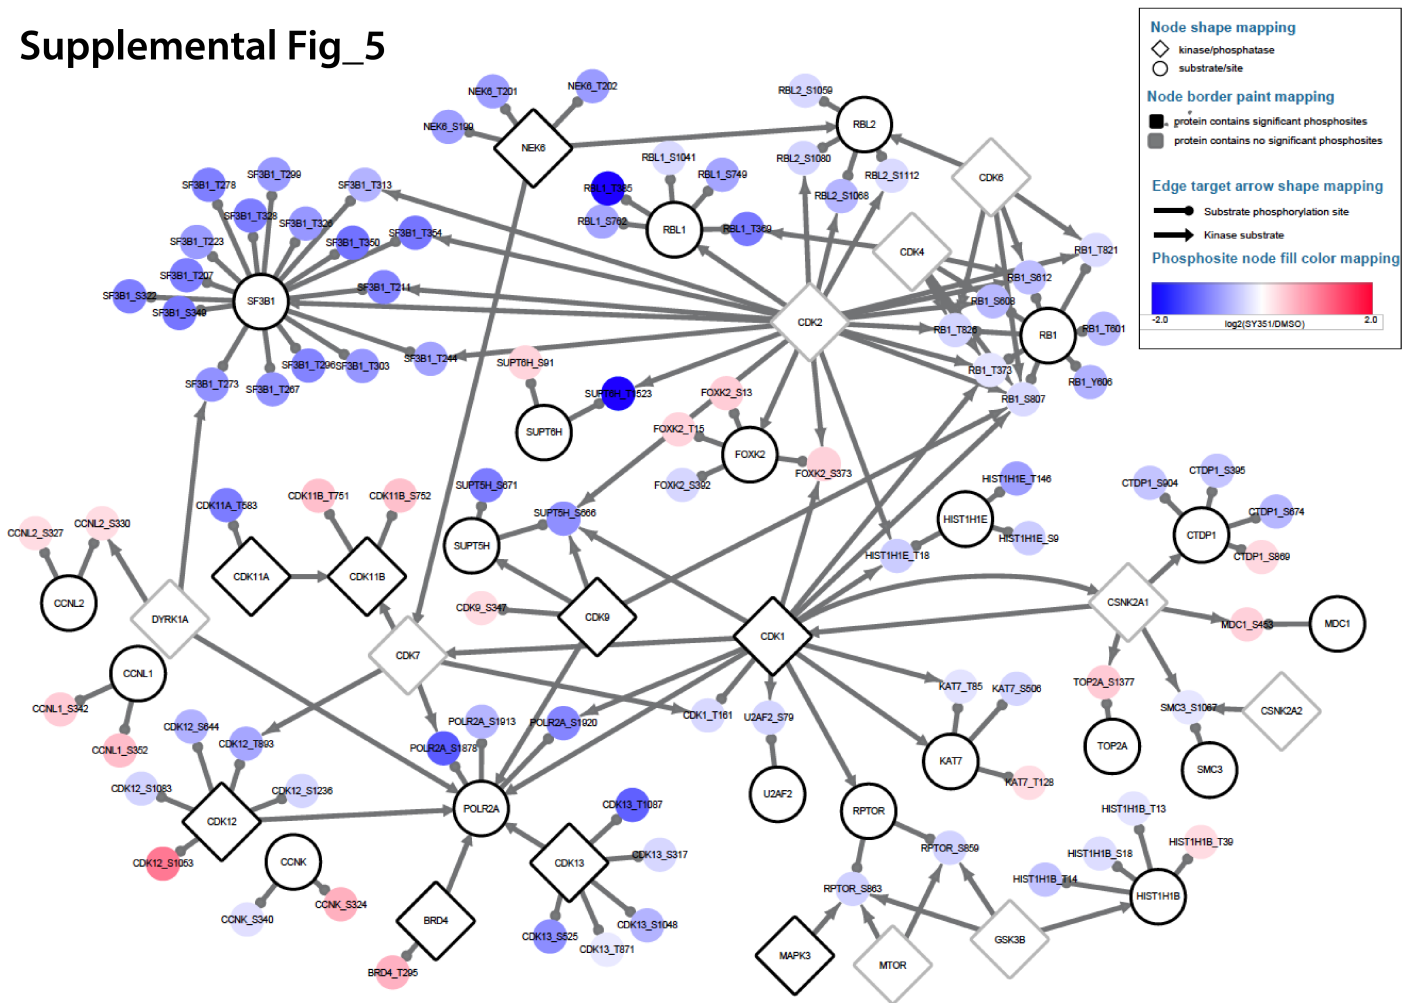

**Supplemental Figure 5. Kinase-substrate network of SY-351 responsive phosphorylation sites.** Phosphorylation sites that changed significantly after 1 hour treatment of HL-60 cells with 50 nM SY-351 (CDK7 inhibitor) are shown, as well as known kinases for those sites, some of which were not observed with significantly changing phospho-sites, e.g. CDK7. The network shown is a subnetwork manually selected from the larger parent network to emphasize only the kinases and substrates within a few degrees of separation from CDK7, CDK9, and POLR2A. Phosphorylation sites were filtered at  $q\text{-value} < 0.05$ , and overlaid onto a kinase substrate network using Cytoscape. Color is mapped to the  $\log_2(\text{SY-351/DMSO})$  ratio.

## Supplementary Fig. 6

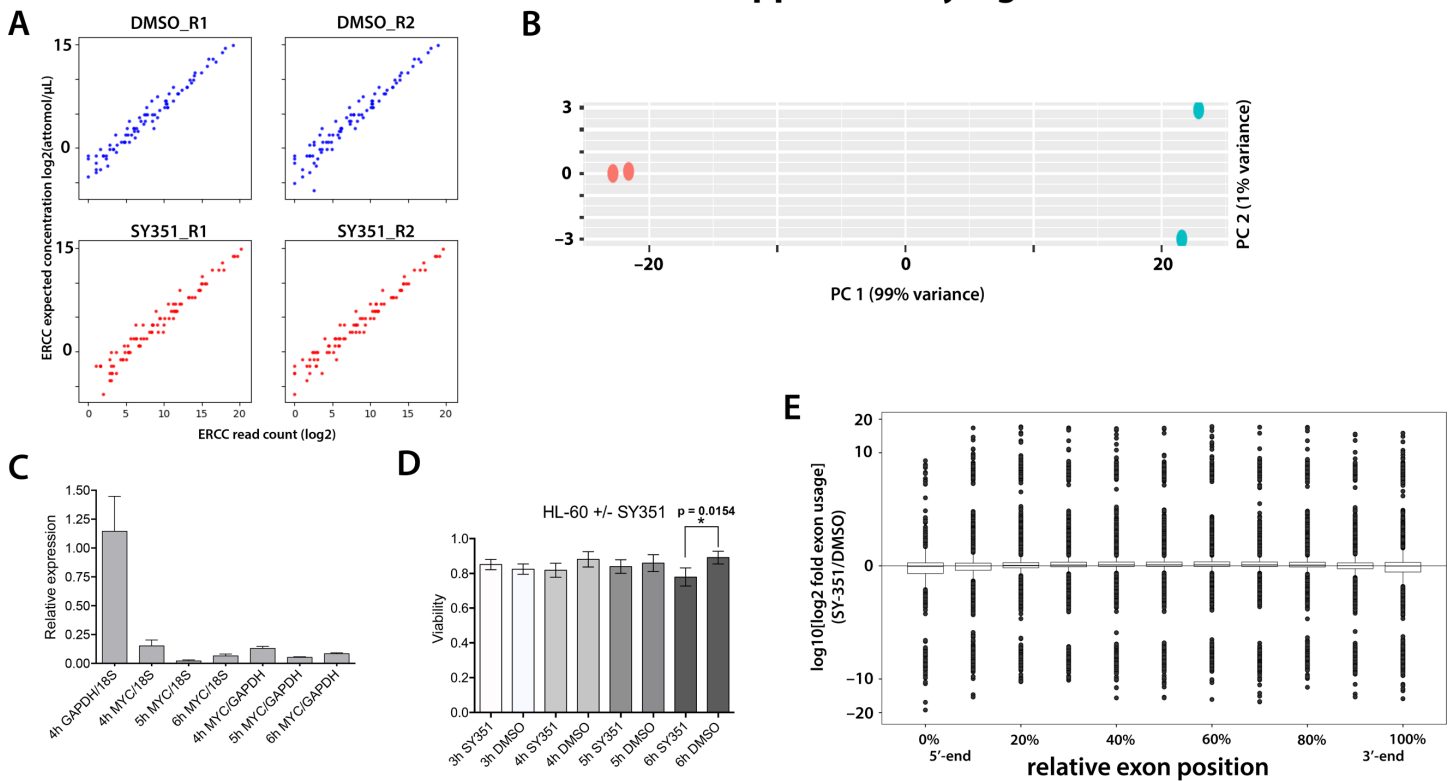

### Supplemental Figure 6. Additional information about RNA-seq experiments in HL60 cells.

(A) ERCC spike-in normalization.

(B) PCA plot for RNA-seq replicates.

(C) RNA levels, measured at t = 5h (RT-qPCR) after treatment of HL60 cells with 50 nM SY-351 (vs. DMSO controls). Expression of MYC was markedly reduced upon CDK7 inhibition, as expected (Kwiatkowski et al. 2014).

(D) Time course of HL60 cell viability following 50 nM SY-351 treatment.

(E) Summary of DEXSeq analysis of genes with more than 10 exons (n = 9767), that compared SY-351 vs. control DMSO cells. Results indicate no loss of exon usage toward gene 3'-ends with SY-351 treatment, which suggests that “off-target” CDK12 inhibition is not occurring. With CDK12 inhibition or knockdown, intronic polyadenylation occurs, causing reduced exon usage toward gene 3'-ends (Dubbury et al. 2018; Krajewska et al. 2019). Note that the box plots were generated after normalizing the log<sub>2</sub>-fold change data using the pseudo-log<sub>10</sub> transformation ( $\text{asinh}(x/2)/\log(10)$ ).



# Supplemental Fig\_7

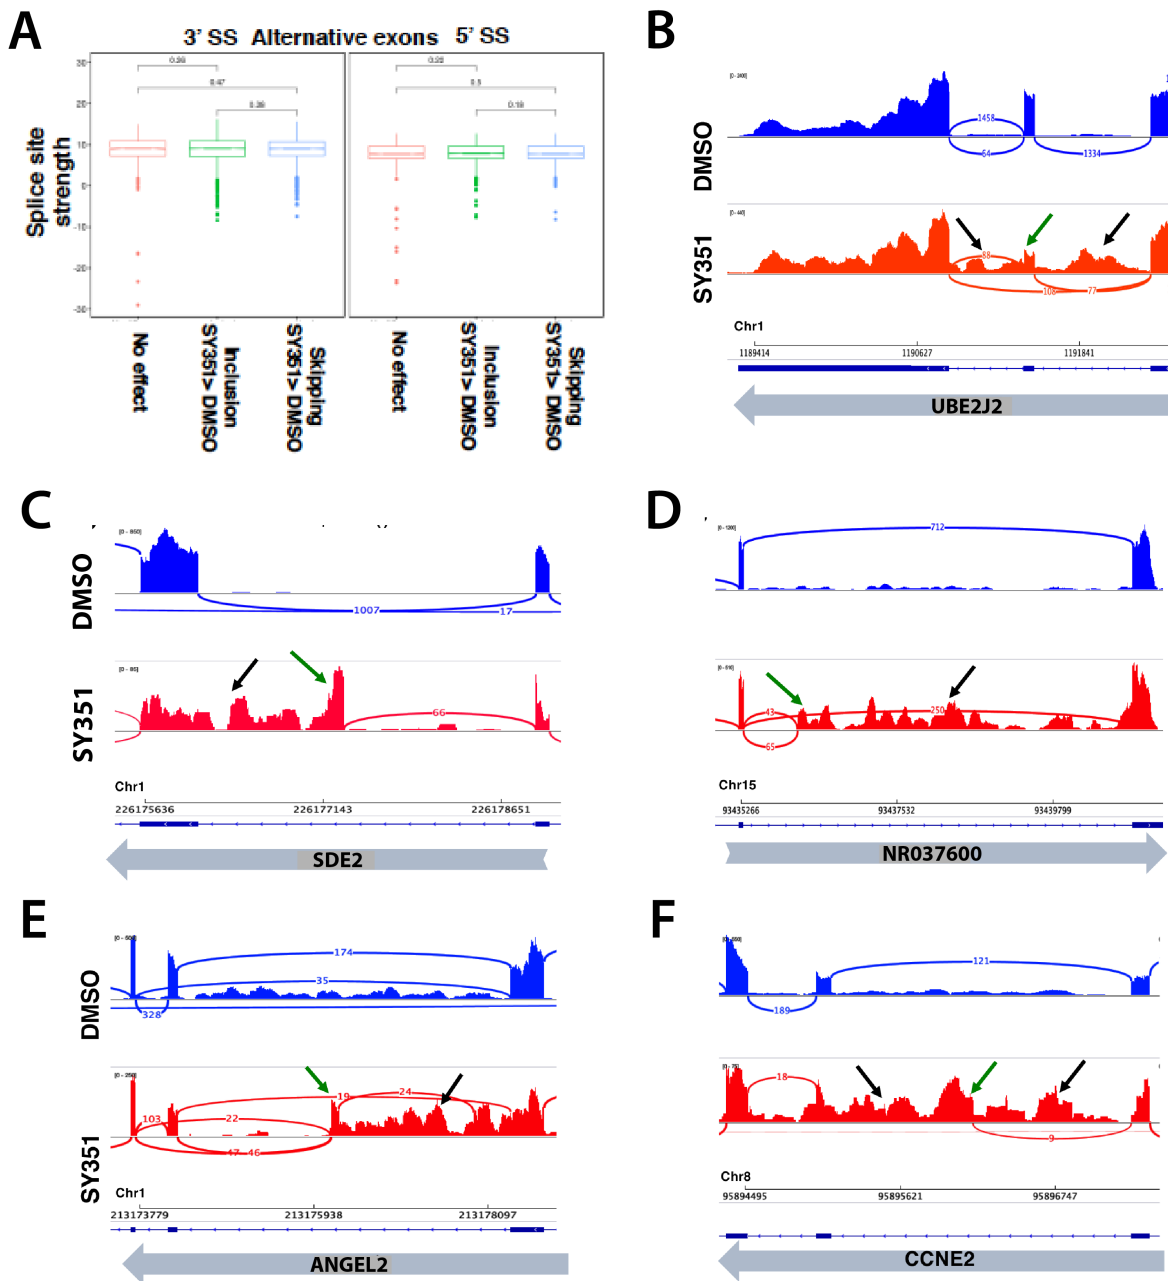

## Supplemental Figure 7. Alternative splicing events affected by SY-351.

(A) Alternative spliced exons affected by SY-351 do not have significantly different 5' or 3' splice site strength from unaffected alternative splicing events. Splice site strengths were calculated according to (Yeo et al. 2004).

(B-F) IGV genome browser Sashimi plots of differential exon inclusion with associated reduction in splicing of flanking introns. Normalized read numbers for DMSO control and SY-351 treated samples are shown on the Y axis. Splice junction read numbers for sense strand transcripts are shown in blue and red. Screen shots are shown for individual RNA-seq data sets. In all cases the changes caused by SY-351 were reproduced in a biological replicate. Green arrows denote changes in exon inclusion; black arrows denote changes in intron retention.

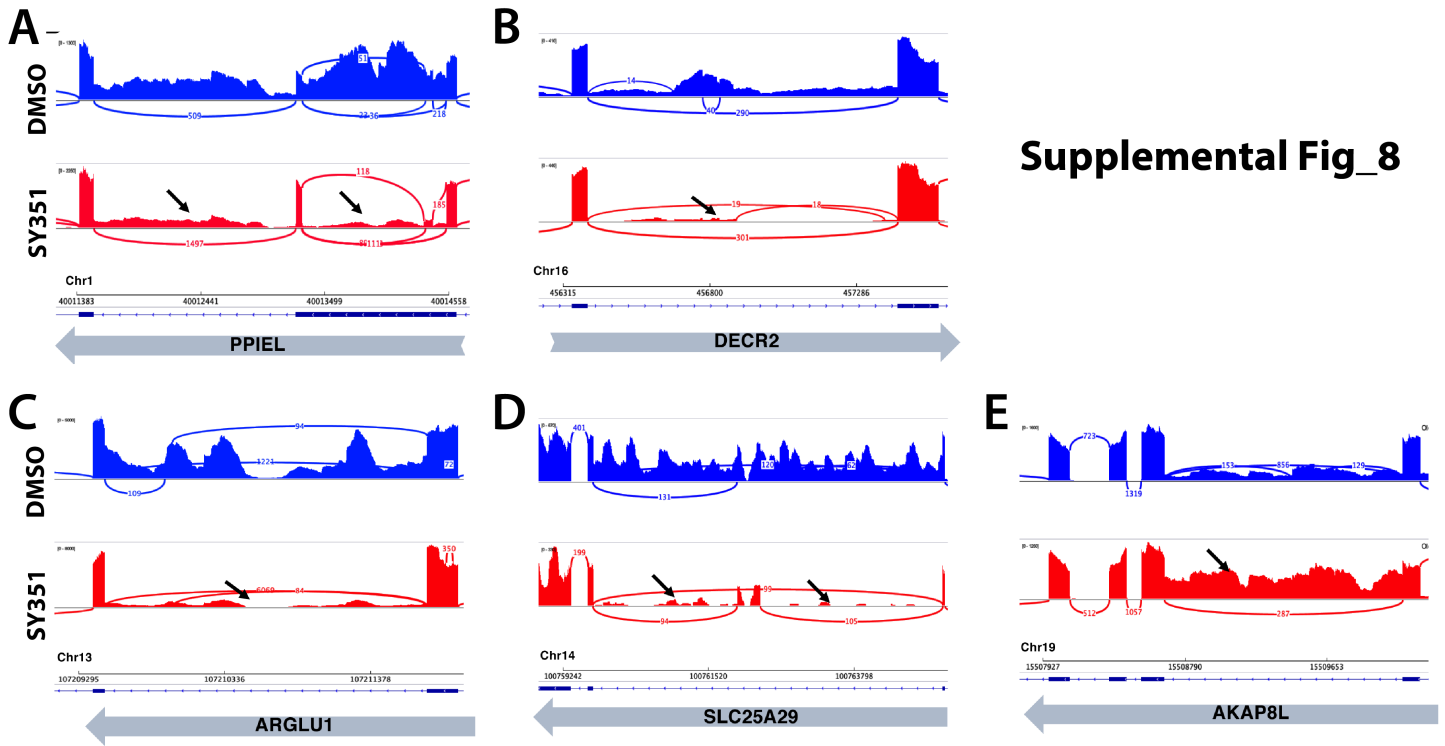

**Supplemental Fig\_8**

**Supplemental Figure 8. Alternative intron retention affected by SY-351.**

(A-D) IGV genome browser Sashimi shots showing increased splicing of retained introns (black arrows) in SY-351.

(E) Decreased splicing of a retained intron (black arrow) in SY-351.

## Supplementary Fig. 9

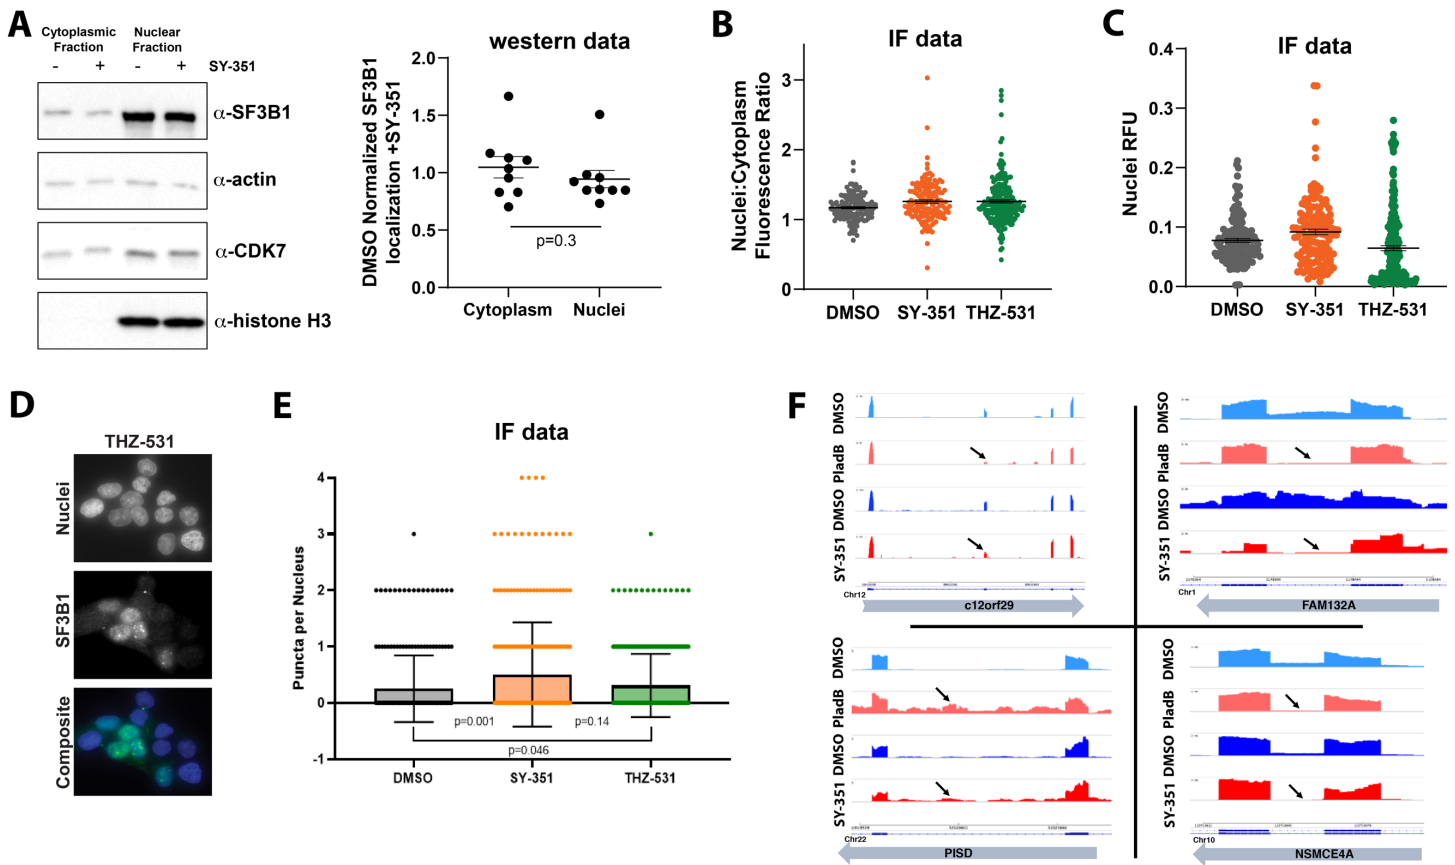

### Supplemental Figure 9. SY-351 alters SF3B1 localization to nuclear speckles.

(A) Quantitative westerns across replicates evaluating endogenous SF3B1 localization to the cytoplasm vs. nucleus, +SY-351 conditions normalized to DMSO (biological,  $n=3$ ; technical,  $n=3$ ).

(B) SF3B1 immunofluorescence data illustrating no significant difference in SF3B1 localization in treatment conditions,  $p>0.9$ .

(C) SF3B1 IF further indicating no significant change in overall nuclear relative fluorescence in DMSO vs. treatment conditions ( SY-351  $p=0.3$  and THZ-531  $p=1.0$  relative to DMSO, SY-351  $p=0.1$  relative to THZ-531).

(D) Immunofluorescence microscopy of endogenous SF3B1 (green) and Hoescht (blue) in THZ-531 conditions.

(E) Quantitation of SF3B1 puncta per nucleus in DMSO vs. SY-351 vs. THZ-531 conditions ( $n=3$  biological replicates).

(F) Representative traces of genes that exhibit similar splicing defects in SY-351 (CDK7 inhibition) and PladB-treated cells (SF3B1 inhibition), respectively.

## Supplementary Fig. 10

**A**

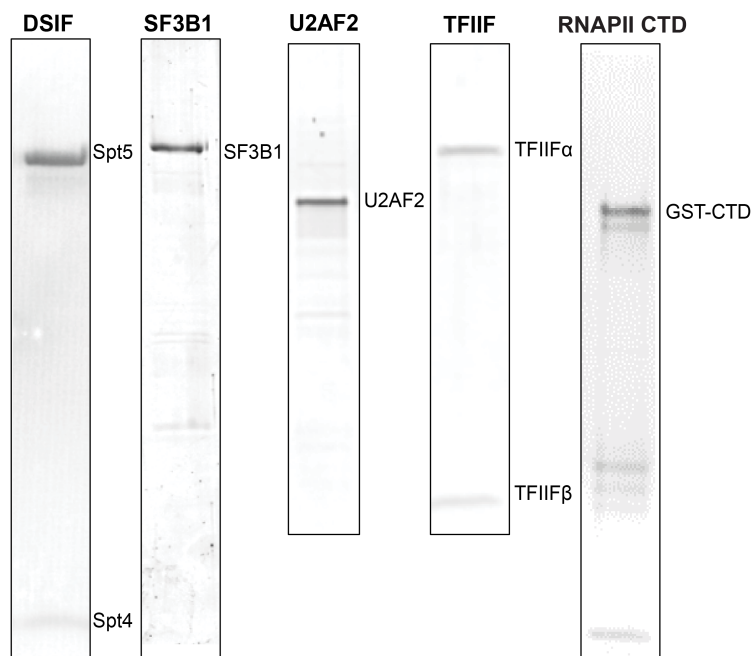

**B**

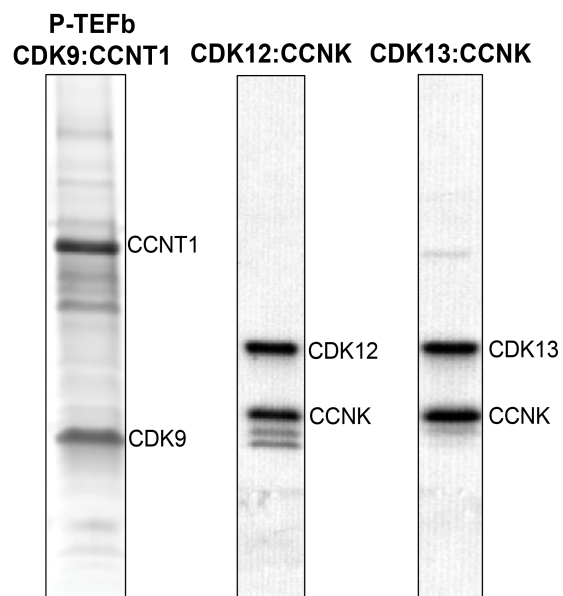

**Supplemental Figure 10. Purified factors used for *in vitro* kinase assays.**

(A) Kinase substrates.

(B) Kinase complexes.

## Supplementary Fig. 11

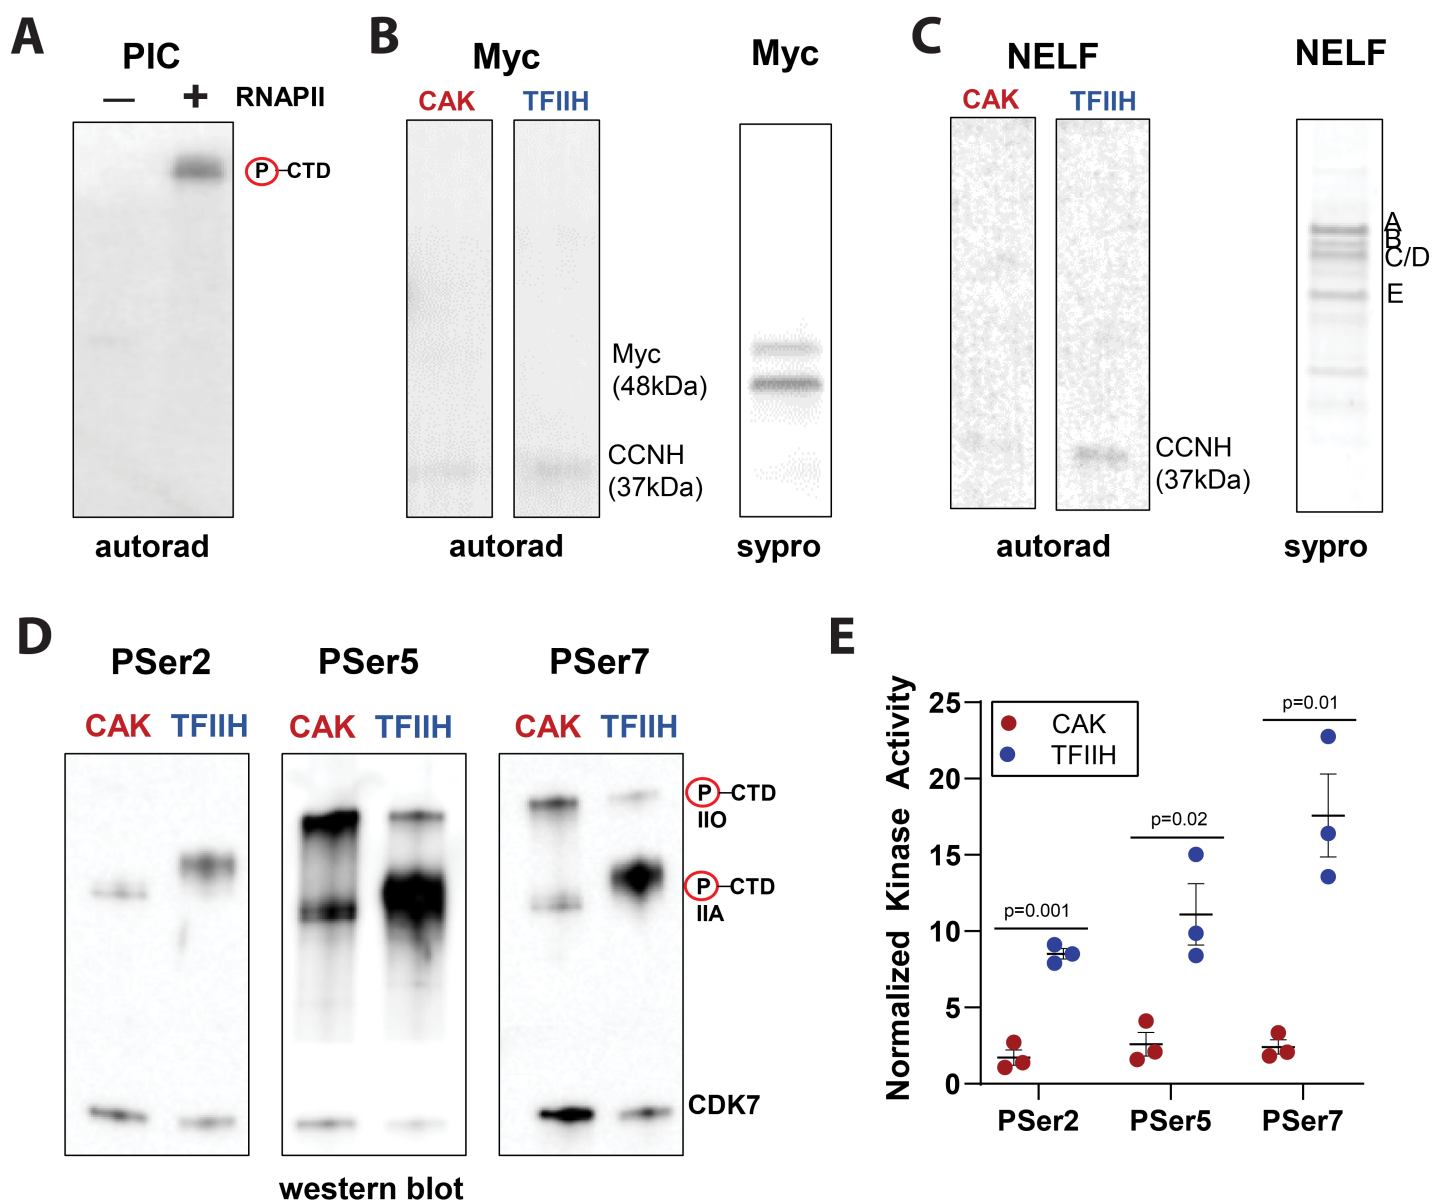

### Supplemental Figure 11. Additional *in vitro* kinase results.

(A) TFIIH phosphorylation of the RNAPII CTD in a transcriptionally active promoter-assembled PIC. The PIC was assembled at the HSPA1B promoter as described (Fant et al. 2020) and contained TFIIA, TFIIB, TFIID, TFIIE, TFIIIF, TFIIH, and Mediator. RNAPII was excluded (-) or added as indicated.

(B, C) CDK7 does not directly phosphorylate MYC (A) or NELF (B) *in vitro*.

(D) Analysis of RNAPII CTD Ser2-, Ser5- and Ser7-phosphorylation by western blot, comparing CDK7 activity within the CAK or TFIIH.

(E) Quantitation of data from panel D, across biological replicates (n=3) with western signal normalized to CDK7

## Supplementary Fig. 12

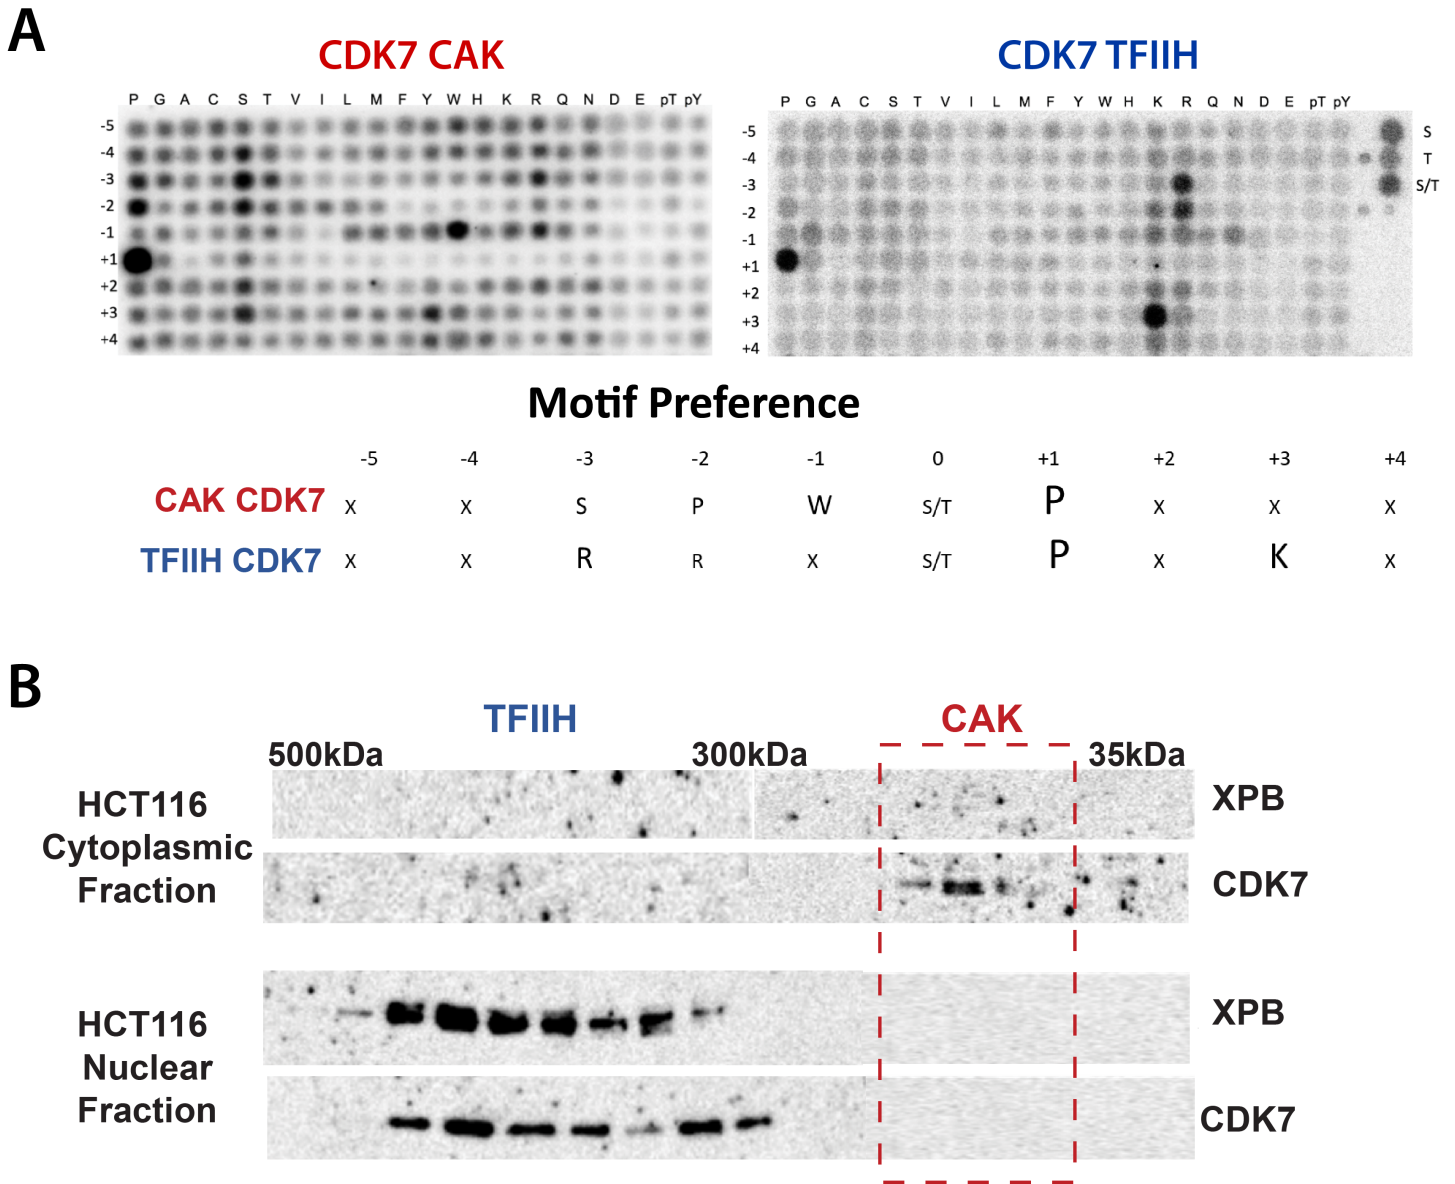

### Supplemental Figure 12. CAK and TFIIH motif preference and cellular localization

(A) Peptide array experiments (Begley et al. 2015) indicate distinct substrate preferences for CDK7 as part of TFIIH or the CAK.

(B) CDK7 does not appear to be present in CAK complexes in the nucleus. Western blots were performed across fractions from a size-exclusion column. Cytoplasmic vs. nuclear fractions were probed; as expected, the CAK was detected in the cytoplasm and TFIIH was detected in the nucleus.

## Supplementary Fig. 13

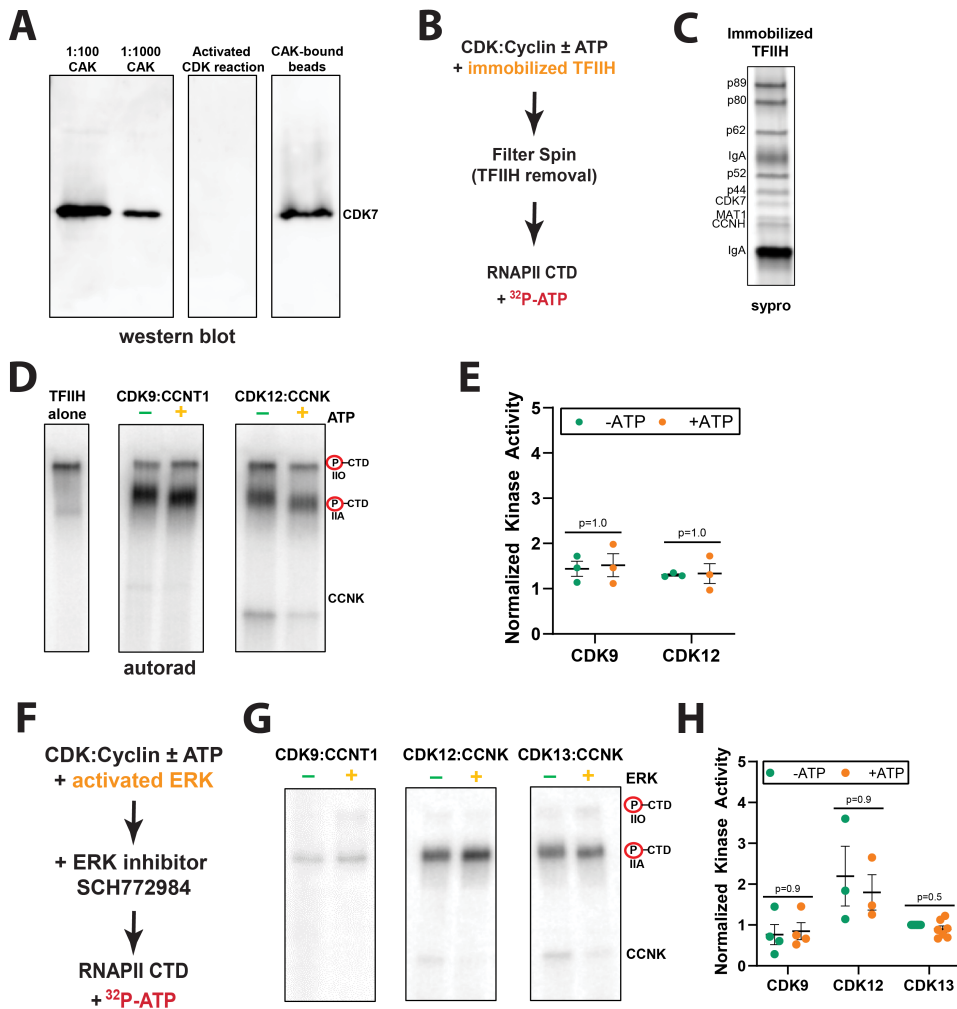

### Supplemental Figure 13. Additional kinase assay details; CDK7 cannot activate CDK9 or CDK12 within TFIIH, ERK cannot activate CDK9, CDK12, or CDK13

- (A) Confirmation that the CAK was effectively depleted from the kinase activation assays with the RNAPII CTD (representative western blot).
- (B) Experimental overview; CDK:cyclin complexes were incubated with immobilized TFIIH  $\pm$  ATP, TFIIH removed by filter spin, and CDK:cyclin complexes tested for activity towards the RNAPII CTD.
- (C) Immobilized TFIIH on Protein A agarose beads, SYPRO Ruby stained.
- (D) *In vitro* activation assays with TFIIH as activating kinase  $\pm$  ATP (instead of the CAK), illustrating CDK7 in the context of TFIIH does not activate, in contrast to CDK7 within the CAK (**Fig. 6**).
- (E) Quantitation of data from panel D, across biological replicates ( $n=3$ ), with autorad signal normalized to TFIIH alone conditions;  $p=0.1$  for CDK9 and CDK12.
- (F) Experimental overview. CDK:cyclin complexes were incubated with ERK  $\pm$  ATP, ERK was then inhibited with the ERK-specific inhibitor SCH772984, and CDK:cyclin complexes tested for activity towards the RNAPII CTD.
- (G) *In vitro* kinase assays performed with ERK as the activating kinase  $\pm$  ATP (instead of the CAK), showing ERK does not function as an activator of CDK9 or CDK12/13.
- (H) Quantitation of data from panel G, across biological replicates ( $n=3$ ), with autorad signal normalized to CDK13  $-$ ATP pre-treatment conditions;  $p$ -values as shown.

**Table S1.** Summary of KiNativ results with SY-351 at 1  $\mu$ M and 0.2  $\mu$ M concentration.

| Kinase(s)                                   | Reference                                                                       | Sequence                        | Labeling Site              | 1 $\mu$ M SY-351 | 0.2 $\mu$ M SY-351 |
|---------------------------------------------|---------------------------------------------------------------------------------|---------------------------------|----------------------------|------------------|--------------------|
| CDK7                                        | UniRef100_P50613                                                                | DLKPNNLLDENGVLK                 | Lys2                       | 98               | 92                 |
| CRK7                                        | UniRef100_Q9NYV4                                                                | DIKCSNILLNNSGQIK                | Lys2                       | 81               | 36                 |
| JNK1, JNK2, JNK3                            | UniRef100_P45983,<br>UniRef100_P53779,<br>UniRef100_P45984                      | DLKPSNIVVK                      | Lys2                       | 71               | 40                 |
| CHED                                        | UniRef100_Q14004                                                                | DIKCSNILLNNR                    | Lys2                       | 65               | 35                 |
| GSK3A                                       | UniRef100_P49840                                                                | DIKPQNLLVDPDTAVLK               | Lys2                       | 54               | 8                  |
| GSK3B                                       | UniRef100_P49841                                                                | DIKPQNLLDPDTAVLK                | Lys2                       | 51               | 16                 |
| RSK4 domain1                                | UniRef100_Q9UK32                                                                | DLKPENILLDEIGHIK                | Lys2                       | 46               | 11                 |
| PKD3                                        | UniRef100_O94806                                                                | DVAIKVIDK                       | Lys1                       | 45               | 19                 |
| PKD3                                        | UniRef100_O94806                                                                | NIVHCDLKPENVLLASAEPPQVK         | Lys2                       | 43               | 18                 |
| PIP4K2C                                     | UniRef100_Q8TBX8                                                                | VKELPTLKDMDFLNK                 | ATP                        | 34               | -7                 |
| PCTAIRE1, PCTAIRE3                          | UniRef100_Q00536,<br>UniRef100_Q07002                                           | DLKPQNLLINER                    | Lys2<br>Activation<br>Loop | 33               | 16                 |
| RSK2 domain1                                | UniRef100_P51812                                                                | LTDFGLSKESIDHEKK                | Lys2                       | 33               | 14                 |
| PIP4K2C                                     | UniRef100_Q8TBX8                                                                | TLVIKEVSEDIADMHSNLSNYHQYIVK     | ATP                        | 33               | -1                 |
| PKD2                                        | UniRef100_Q9BZL6                                                                | DVAVKVIDK                       | Lys1                       | 31               | 24                 |
| CDK9                                        | UniRef100_P50750                                                                | DMKAAANVLITR                    | Lys2                       | 29               | -11                |
| PKCa, PKCb                                  | UniRef100_P05771,<br>UniRef100_P17252                                           | DLKLDNVMLDSEGHK                 | Lys2                       | 28               | 2                  |
| TLK1                                        | UniRef100_Q9UKI8                                                                | YAAVKIHQLNK                     | Lys1                       | 28               | 16                 |
| PCTAIRE2, PCTAIRE3                          | UniRef100_Q00537,<br>UniRef100_Q07002                                           | SKLTENLVALKEIR                  | Lys1                       | 26               | 4                  |
| RSK2 domain1                                | UniRef100_P51812                                                                | VLGQGSFGKVFLVK                  | ATP Loop                   | 25               | -7                 |
| PCTAIRE2                                    | UniRef100_Q00537                                                                | DLKPQNLLINEK                    | Lys2                       | 24               | 4                  |
| GCN2                                        | UniRef100_Q9P2K8                                                                | LDGCCYAVKR                      | Lys1                       | 23               | 19                 |
| MAP2K6                                      | UniRef100_P52564,<br>UniRef100_L5KNH7                                           | HVPSGQIMAVKR                    | Lys1                       | 22               | 8                  |
| NEK4                                        | UniRef100_P51957                                                                | DLKTQNVFLTR                     | Lys2<br>Activation<br>Loop | 22               | 9                  |
| FER                                         | UniRef100_P16591                                                                | QEDGGVYSSSLKQIPIK               | Lys2                       | 21               | 5                  |
| RSK1 domain1, RSK2 domain1,<br>RSK3 domain1 | UniRef100_P51812,<br>UniRef100_Q15418,<br>UniRef100_Q15349                      | DLKPENILLDEEGHIK                | Lys2                       | 20               | -11                |
| TAO1, TAO3                                  | UniRef100_Q7L7X3,<br>UniRef100_Q9H2K8                                           | DIKAGNILLTEPGQVK                | Lys2                       | 19               | 12                 |
| RSK2 domain1                                | UniRef100_P51812                                                                | DLKPENILLDEEGHIKLTDFGLSKESIDHEK | Lys2                       | 19               | 5                  |
| CDK5                                        | UniRef100_Q00535                                                                | NRETHEIVALKR                    | Lys1                       | 18               | 13                 |
| RON                                         | UniRef100_Q04912                                                                | IQCAIKSLSR                      | Lys1                       | 18               | 13                 |
| PI4KB                                       | UniRef100_Q9UBF8                                                                | VPHTQAVVLNSKDK                  | ATP                        | 18               | 14                 |
| PKN2                                        | UniRef100_Q16513                                                                | DLKLDNLLDTEGFVK                 | Lys2                       | 18               | -13                |
| Erk5                                        | UniRef100_Q13164                                                                | DLKPSNLLVNCENELK                | Lys2                       | 18               | 4                  |
| MST4, YSK1                                  | UniRef100_Q00506,<br>UniRef100_Q9P289                                           | DIKAANVLLSEQGDVK                | Lys2                       | 18               | 16                 |
| CaMK2a, CaMK2b, CaMK2d,<br>CaMK2g           | UniRef100_Q53H78,<br>UniRef100_Q13557,<br>UniRef100_Q13555,<br>UniRef100_Q9UQM7 | DLKPENLLLASK                    | Lys2                       | 17               | 5                  |
| TAO2                                        | UniRef100_Q9UL54                                                                | DVKAGNILLSEPLVK                 | Lys2<br>Activation<br>Loop | 17               | 9                  |
| EphB4                                       | UniRef100_P54760                                                                | FLEENSSDPTYSSLGGKIPIR           | Lys2                       | 17               | 7                  |
| YANK3                                       | UniRef100_Q86UX6                                                                | DVKPDNILLDER                    | Lys2                       | 16               | -8                 |
| MAP2K6                                      | UniRef100_P52564,<br>UniRef100_L5KNH7                                           | DVKPSNVLINALGQVK                | Lys2                       | 16               | 2                  |
| TLK2                                        | UniRef100_Q86UE8                                                                | YVAVKIHQLNK                     | Lys1                       | 16               | 8                  |
| MLK3                                        | UniRef100_Q16584                                                                | GELVAVKAAR                      | Lys1                       | 16               | 19                 |
| MLK2                                        | UniRef100_Q02779                                                                | DLKSINILILEAIENHNLADTVLK        | Lys2                       | 16               | -12                |
| CRK                                         | UniRef100_Q8IZL9                                                                | DLKPANLLISASGQLK                | Lys2                       | 16               | 7                  |



|                |                                                                                 |                                 |                            |    |     |
|----------------|---------------------------------------------------------------------------------|---------------------------------|----------------------------|----|-----|
| PI4KA, PI4KAP2 | UniRef100_A4QPH2,<br>UniRef100_P42356                                           | SGTPMQSAAKAPYLAK                | ATP                        | 15 | 1   |
| NEK1           | UniRef100_Q96PY6                                                                | DIKSQNFILTK                     | Lys2                       | 15 | 2   |
| LYN            | UniRef100_P07948                                                                | VAVKTLKPGTMSVQAFLEEANLMK        | Lys1                       | 15 | -23 |
| p38a           | UniRef100_Q16539                                                                | DLKPSNLAVNEDCELK                | Lys2<br>Activation<br>Loop | 15 | 0   |
| EphA2          | UniRef100_P29317                                                                | VLEDDPEATYTTSGGKIPIR            | Loop                       | 15 | 14  |
| MAP3K5         | UniRef100_Q99683                                                                | DIKGDNLINTYSGVLK                | Lys2                       | 15 | 5   |
| RSK1 domain2   | UniRef100_Q15418                                                                | DLKPSNILYVDESGNPECLR            | Lys2                       | 15 | -2  |
| smMLCK         | UniRef100_Q15746                                                                | QGIVHLDLKPENIMCVNK              | Lys2                       | 14 | -1  |
| CLK3           | UniRef100_P49761                                                                | YEIVGNLGEFTFGKVVVECLDHAR        | ATP Loop                   | 14 | -11 |
| GCK            | UniRef100_Q12851                                                                | DIKGANLLTLQGDVK                 | Lys2                       | 14 | 10  |
| EGFR           | UniRef100_P00533                                                                | LLGAEKEYHAEGGKVIPIK             | Lys2<br>Activation<br>Loop | 14 | 18  |
| DNAPK          | UniRef100_P78527                                                                | KGGSWIQEINVAEK                  | ATP<br>Activation<br>Loop  | 14 | 11  |
| MET            | UniRef100_P08581                                                                | DMYDKEYYSVHVK                   | Loop                       | 13 | 13  |
| IKKe, TBK1     | UniRef100_Q14164,<br>UniRef100_Q9UHD2                                           | DIKPGNIMR                       | Lys2                       | 13 | 1   |
| IKKb           | UniRef100_Q14920                                                                | WHNQETGEQIAIKQCR                | Lys1                       | 13 | 19  |
| RSK1 domain1   | UniRef100_Q15418                                                                | DLKPENILLDEEGHIKLTDFGLSKEAIDHEK | Lys2                       | 13 | -1  |
| LATS1          | UniRef100_Q95835                                                                | ALYATKTLR                       | Lys1                       | 13 | 18  |
| CDK2           | UniRef100_P24941                                                                | DLKPQNLLINTEGAIK                | Lys2                       | 13 | 1   |
| ULK1           | UniRef100_Q75385                                                                | DLKPQNILLSNPAGR                 | Lys2                       | 13 | 9   |
| MAP3K6         | UniRef100_Q95382                                                                | DIKGDNLINTFSGLLK                | Lys2                       | 13 | 14  |
| PKR            | UniRef100_P19525                                                                | DLKPSNIFLVDTK                   | Lys2                       | 13 | -8  |
| AMPKa1, AMPKa2 | UniRef100_P54646,<br>UniRef100_Q96E92                                           | VAVKILNR                        | Lys1                       | 13 | 17  |
| MAST1, MAST2   | UniRef100_Q6P0Q8,<br>UniRef100_Q9Y2H9,<br>UniRef100_P36507,<br>UniRef100_Q02750 | DLKPDNLLITSMGHIK                | Lys2                       | 12 | -18 |
| MAP2K1, MAP2K2 | UniRef100_Q02750                                                                | KLIHLEIKPAIR                    | Lys1                       | 12 | 12  |
| PKD1           | UniRef100_Q15139                                                                | DVAIKIIDK                       | Lys1                       | 12 | 10  |
| KSR1, KSR2     | UniRef100_Q6VAB6,<br>UniRef100_Q8IVT5                                           | SKNVFYDNGK                      | Lys1<br>Activation<br>Loop | 12 | 13  |
| MAP2K3         | UniRef100_P46734                                                                | HAQSGTIMAVKR                    | Lys1                       | 12 | 0   |
| TLK2           | UniRef100_Q86UE8                                                                | YLNEIKPPIHYDLKPGNILLVNGTACGEIK  | Lys2                       | 12 | 7   |
| NEK8           | UniRef100_Q86SG6                                                                | DLKTQNILLDK                     | Lys2                       | 12 | 6   |
| MAP3K4         | UniRef100_Q9Y6R4                                                                | DIKGANIFLTSSGLIK                | Lys2                       | 12 | 11  |
| MAP2K4         | UniRef100_P45985                                                                | MVHKPSGQIMAVKR                  | Lys1                       | 11 | 1   |
| CDK5           | UniRef100_Q00535                                                                | DLKPQNLLINR                     | Lys2                       | 11 | 7   |
| STLK6          | UniRef100_Q9C0K7                                                                | HTPTGTLVTIKITNLENCNEER          | Lys1                       | 11 | -1  |
| IKKa           | UniRef100_Q15111                                                                | DLKPENIVLQDVGGK                 | Lys2                       | 11 | 5   |
| p38d, p38g     | UniRef100_Q15264,<br>UniRef100_P53778,<br>UniRef100_P54646,<br>UniRef100_Q96E92 | DLKPGNLAVNEDCELK                | Lys2                       | 11 | 4   |
| AMPKa1, AMPKa2 | UniRef100_Q96E92                                                                | DLKPENVLLDAHMNAK                | Lys2                       | 11 | -6  |
| MAP2K3         | UniRef100_P46734                                                                | DVKPSNVLINK                     | Lys2                       | 11 | 12  |
| AurA           | UniRef100_Q14965                                                                | DIKPENLLGSAGELK                 | Lys2                       | 11 | 6   |
| NEK6, NEK7     | UniRef100_Q8TDX7,<br>UniRef100_Q9HC98                                           | DIKPANVFITATGVVK                | Lys2                       | 11 | 1   |
| MLK1           | UniRef100_P80192                                                                | DLKSSNILILQK                    | Lys2                       | 11 | 2   |
| ZAK            | UniRef100_Q9NYL2                                                                | WISQDKEVAVKK                    | Lys1                       | 10 | 14  |
| MPSK1          | UniRef100_Q75716                                                                | LGEGGFSYVDLVEGLHDGHFYALKR       | Lys1                       | 10 | 2   |
| eEF2K          | UniRef100_Q00418                                                                | YIKYNSNSGFVR                    | ATP<br>Activation<br>Loop  | 10 | 8   |
| FAK            | UniRef100_Q05397                                                                | YMEDSTYYKASK                    | Loop                       | 10 | -10 |
| CDK2           | UniRef100_P24941                                                                | LTGEVVALKK                      | Lys1                       | 10 | 2   |
| MST1, MST2     | UniRef100_Q13188,<br>UniRef100_Q13043                                           | DIKAGNILLNTEGHAK                | Lys2                       | 10 | 3   |

|                             |                                                            |                               |                       |    |     |
|-----------------------------|------------------------------------------------------------|-------------------------------|-----------------------|----|-----|
| MAP2K7                      | UniRef100_O14733                                           | DVKPSNILLDER                  | Lys2                  | 10 | 3   |
| EphB2                       | UniRef100_P29323                                           | FLEDDTSDPTYTSALGGKIPIR        | Activation Loop       | 10 | -1  |
| ILK                         | UniRef100_Q13418                                           | ISMADVKFSFQCPGR               | Protein Kinase Domain | 9  | -2  |
| CDC2                        | UniRef100_Q5H9N4                                           | DLKPQNLLIDDK                  | Lys2                  | 9  | 16  |
| PKR                         | UniRef100_P19525                                           | IGDFGLVTSLKNDGKR              | Activation Loop       | 9  | -7  |
| GCN2                        | UniRef100_Q9P2K8                                           | DLKPVNIFLDSDDHVK              | Lys2                  | 9  | -8  |
| PRP4                        | UniRef100_Q13523                                           | AAGIGKDFKENPNLR               | Protein Kinase Domain | 9  | 19  |
| ULK3                        | UniRef100_D3DW67                                           | NISHLDLKPQNILLSSLEKPHLK       | Lys2                  | 9  | 14  |
| PKD1, PKD2                  | UniRef100_Q9BZL6,<br>UniRef100_Q15139                      | NIVHCDLKPENVLLASADPPFQVK      | Lys2                  | 9  | -3  |
| ULK3                        | UniRef100_D3DW67                                           | EVVAIKCVAK                    | Lys1                  | 9  | 15  |
| MLK3                        | UniRef100_Q16584                                           | DLKSNILLLQPIESDDMEHK          | Lys2                  | 9  | -19 |
| NEK9                        | UniRef100_Q8TD19                                           | RTEDDSLVLVWKEVDLTR            | Lys1                  | 9  | 1   |
| RSK1 domain1                | UniRef100_Q15418                                           | LTDFGLSKEAIDHEKK              | Activation Loop       | 8  | -2  |
| IRE1                        | UniRef100_O75460                                           | DLKPHNILISMPNAHGK             | Lys2                  | 8  | -4  |
| NDR1                        | UniRef100_Q15208                                           | DIKPDNLLLDISK                 | Lys2                  | 8  | 7   |
| LATS2                       | UniRef100_Q9NRM7                                           | DIKPDNILIDLGHK                | Lys2                  | 8  | 6   |
| TAK1                        | UniRef100_Q43318                                           | DLKPPNLLL VAGGTVLK            | Lys2                  | 8  | 9   |
| ZC1/HGK, ZC2/TNIK, ZC3/MINK | UniRef100_Q95819,<br>UniRef100_Q9UKE5,<br>UniRef100_Q8N4C8 | DIKQNVLLTENA EVK              | Lys2                  | 8  | 4   |
| CK2a2                       | UniRef100_P19784                                           | DVKPHNV MIDHQKQK              | Lys2                  | 7  | 8   |
| MARK1, MARK2                | UniRef100_Q7KZ17,<br>UniRef100_Q9POL2                      | EVAVKIIDK                     | Lys1                  | 7  | 5   |
| IRAK1                       | UniRef100_P51617                                           | AIQFLHQDSPSLIHGDIKSSNVLLDER   | Lys2                  | 7  | -2  |
| PITSLRE                     | UniRef100_P21127                                           | DLKTSNLLSHAGILK               | Lys2                  | 7  | -5  |
| FER                         | UniRef100_P16591                                           | TSVAVKTCKEDLPQELK             | Lys1                  | 7  | 13  |
| GPRK5                       | UniRef100_P34947                                           | DLKPENILLDDYGHIR              | Lys2                  | 7  | -10 |
| MAP2K4                      | UniRef100_P45985                                           | DIKPSNILLDR                   | Lys2                  | 7  | 6   |
| MAP3K1                      | UniRef100_Q13233                                           | DVKGANLLIDSTGQR               | Lys2                  | 6  | 11  |
| SGK2                        | UniRef100_Q9HBY8                                           | KSDGAFYAVKVLQK                | Lys1                  | 6  | 3   |
| CDC2                        | UniRef100_Q5H9N4                                           | DLKPQNLLIDDKGTIK              | Lys2                  | 6  | 6   |
| ABL, ARG                    | UniRef100_P00519,<br>UniRef100_P42684                      | YSLTVAVKTLKEDTMEVEEFLK        | Lys1                  | 6  | 5   |
| MSK1 domain1                | UniRef100_O75582                                           | DIKLENILLDSNGHVLLTDFGLSK      | Lys2                  | 6  | 14  |
| MAP3K2, MAP3K3              | UniRef100_Q9Y2U5,<br>UniRef100_Q99759                      | DIKGANILR                     | Lys2                  | 6  | 10  |
| PIK3CB                      | UniRef100_P42338                                           | VFGEDSVGVIFKNGDDLRLQDMLTLQMLR | ATP                   | 6  | 3   |
| AMPKa1                      | UniRef100_Q96E92                                           | IGHYILGDTLGVGTGFKVK           | ATP Loop              | 6  | -1  |
| MST3                        | UniRef100_Q9Y6E0                                           | DIKAANVLLSEHGEVK              | Lys2                  | 6  | 2   |
| CASK                        | UniRef100_O14936                                           | ETGQQFAVKIVDVAK               | Lys1                  | 6  | -13 |
| NDR1                        | UniRef100_Q15208                                           | DTGHVYAMKILR                  | Lys1                  | 6  | -4  |
| NDR2                        | UniRef100_Q9Y2H1                                           | DIKPDNLLLDAK                  | Lys2                  | 6  | 0   |
| SLK                         | UniRef100_Q9H2G2                                           | AQNKETSVLAAAKVIDTK            | Lys1                  | 6  | 0   |
| IKKb                        | UniRef100_O14920                                           | DLKPENIVLQQGEQR               | Lys2                  | 6  | 3   |
| CHK2                        | UniRef100_Q96017                                           | DLKPENVLLSSQEEDCLIK           | Lys2                  | 6  | -5  |
| MAP2K1, MAP2K2              | UniRef100_P36507,<br>UniRef100_Q02750                      | DVKPSNIVNSR                   | Lys2                  | 6  | 5   |
| MASTL                       | UniRef100_Q96GX5                                           | GAFGKVYLGQK                   | ATP Loop              | 5  | -2  |
| MRCKb                       | UniRef100_Q9Y5S2                                           | DIKPDNVLLDVNGHIR              | Lys2                  | 5  | -3  |
| MAP2K1                      | UniRef100_Q02750                                           | IMHRDVKPSNIVNSR               | Lys2                  | 5  | 1   |
| PIP5K3                      | UniRef100_Q9Y2I7                                           | GGKSGAAFYATEDDRFILK           | ATP                   | 5  | 7   |

|                         |                                                                                                                          |                                    |                             |   |     |
|-------------------------|--------------------------------------------------------------------------------------------------------------------------|------------------------------------|-----------------------------|---|-----|
| NuaK1                   | UniRef100_O60285                                                                                                         | DLKLENILLDDNCNIK                   | Lys2                        | 5 | 8   |
| SNRK                    | UniRef100_Q9NRH2                                                                                                         | DLKPENVVFFEK                       | Lys2                        | 5 | -8  |
| ROCK1, ROCK2            | UniRef100_O75116,<br>UniRef100_Q13464                                                                                    | DVKPDNMLLDK                        | Lys2                        | 5 | -2  |
| CDK11, CDK8             | UniRef100_P49336,<br>UniRef100_Q9BWU1                                                                                    | DLKPANILVMGEGPER                   | Lys2                        | 5 | -22 |
| RSK2 domain2            | UniRef100_P51812                                                                                                         | DLKPSNILYVDESGNPESIR               | Lys2                        | 5 | -5  |
| STLK3                   | UniRef100_Q9UEW8                                                                                                         | DLKAGNILLGEDGSVQIADFGVSAFLATGGDVTR | Lys2                        | 4 | 16  |
| TGFbR2                  | UniRef100_P37173                                                                                                         | DLKSSNILVK                         | Lys2                        | 4 | -7  |
| Erk2                    | UniRef100_P28482                                                                                                         | DLKPSNLLLNTTCDLK                   | Lys2                        | 4 | 0   |
| FRAP                    | UniRef100_P42345                                                                                                         | IQSIAPSLQVITSKQRPR                 | ATP                         | 4 | 3   |
| MASTL                   | UniRef100_Q96GX5                                                                                                         | LYAVKVVK                           | Lys1                        | 4 | 14  |
| JAK1 domain2            | UniRef100_P23458                                                                                                         | YDPEGDNTGEQVAVKSLKPESGGNHIADLKK    | Lys1                        | 4 | 21  |
| TYK2 domain2            | UniRef100_P29597                                                                                                         | IGDFGLAKAVPEGHEYR                  | Activation<br>Loop          | 4 | -3  |
| FRK                     | UniRef100_P42685<br>UniRef100_Q99683,<br>UniRef100_Q95382,<br>UniRef100_Q6ZN16                                           | HEIKLPVK                           | Activation<br>Loop          | 4 | 18  |
| MAP3K15, MAP3K5, MAP3K6 |                                                                                                                          | IAIKEIPER                          | Lys1                        | 3 | 3   |
| SLK                     | UniRef100_Q9H2G2                                                                                                         | DLKAGNIFTLDGDIK                    | Lys2                        | 3 | 6   |
| MAST3                   | UniRef100_O60307                                                                                                         | DLKPDNLLITSLGHIK                   | Lys2                        | 3 | -3  |
| JAK1                    | UniRef100_P23458                                                                                                         | QLASALSYLEDKDLVHGNVCTKNLLLAR       | Protein<br>Kinase<br>Domain | 3 | -15 |
| CaMK1a                  | UniRef100_Q14012                                                                                                         | LVAIKCIAK                          | Lys1                        | 3 | -1  |
| MARK2, MARK3            | UniRef100_P27448,<br>UniRef100_Q7KZ17<br>UniRef100_Q9Y3S1,<br>UniRef100_D3DUP1,<br>UniRef100_Q9BYP7<br>UniRef100_Q9UBS0, | DLKAENLLLDADMNIK                   | Lys2                        | 3 | -8  |
| Wnk1, Wnk2, Wnk3        | UniRef100_P23443<br>UniRef100_C9JIG9,<br>UniRef100_Q95747<br>UniRef100_Q9Y243,<br>UniRef100_P31751                       | DLKCDNIFITGPTGSVK                  | Lys2                        | 3 | 4   |
| p70S6K, p70S6Kb         |                                                                                                                          | GGYGKVFQVR                         | ATP Loop                    | 3 | -8  |
| OSR1                    |                                                                                                                          | DVKAGNILLGEDGSVQIADFGVSAFLATGGDITR | Lys2                        | 3 | 14  |
| AKT2, AKT3              |                                                                                                                          | GTFGKVILVR                         | ATP Loop                    | 3 | 5   |
| PEK                     | UniRef100_Q9NZJ5                                                                                                         | DLKPSNIFFTMDDVVK                   | Lys2                        | 3 | -16 |
| LATS1                   | UniRef100_Q95835                                                                                                         | DIKPDNILDIDR                       | Lys2                        | 3 | 1   |
| GCK                     | UniRef100_Q12851                                                                                                         | DTVTSELAAVKIVK                     | Lys1                        | 3 | -13 |
| CK1g2                   | UniRef100_P78368                                                                                                         | DVKPENFLVGRPGTK                    | Lys2                        | 3 | 3   |
| MAP3K2                  | UniRef100_Q9Y2U5                                                                                                         | ELAVKQVQFDPSPETSKEVNALECEIQLLK     | Lys1                        | 2 | 3   |
| PAK4                    | UniRef100_O96013                                                                                                         | DIKSDSILLTHDGR                     | Lys2                        | 2 | -9  |
| KHS2                    | UniRef100_Q8IVH8                                                                                                         | DIKGANILLTDNGHVK                   | Lys2                        | 2 | 7   |
| PIP4K2A                 | UniRef100_P48426                                                                                                         | AKELPTLKDNDFINEGQK                 | ATP                         | 2 | 7   |
| p70S6Kb                 | UniRef100_Q9UBS0                                                                                                         | DLKPENIMLSSQGHK                    | Lys2                        | 2 | -3  |
| ACK                     | UniRef100_Q07912                                                                                                         | TVSVAVKCLKPDVLSQPEAMDDFIR          | Lys1                        | 2 | -13 |
| MLK4                    | UniRef100_Q5TCX8                                                                                                         | DLKSSNILLEK                        | Lys2                        | 2 | -5  |
| FAK                     | UniRef100_Q05397                                                                                                         | CIGEGQFGDVHQGIYMSPENPALAVAICTCK    | Lys1                        | 2 | -24 |
| PKCi                    | UniRef100_P41743                                                                                                         | DLKLDNVLLDSEGHK                    | Lys2                        | 2 | 14  |
| CaMK1d                  | UniRef100_Q8IU85                                                                                                         | LFAVKCIPK                          | Lys1                        | 2 | 2   |
| MST2                    | UniRef100_Q13188                                                                                                         | ESGQVVAIKQVPVESDLQEIIK             | Lys1                        | 1 | -4  |
| MSK2 domain1            | UniRef100_O75676                                                                                                         | DLKLENVLLDSEGHIVLTDGFLSK           | Lys2                        | 1 | 2   |
| TLK1                    | UniRef100_Q9UKI8                                                                                                         | YLNEIKPPIIHYDLKPGNILLVDGTACGEIK    | Lys2                        | 1 | -6  |
| Erk1                    | UniRef100_P27361<br>UniRef100_Q96J92,<br>UniRef100_Q9Y3S1,<br>UniRef100_D3DUP1                                           | DLKPSNLLINTTCDLK                   | Lys2                        | 1 | 2   |
| Wnk1, Wnk2, Wnk4        |                                                                                                                          | IGDGLATLKR                         | Activation<br>Loop          | 1 | -2  |
| BRAF                    | UniRef100_P15056                                                                                                         | DLKSNNIFLHEDLTVK                   | Lys2                        | 1 | 3   |
| CLK1                    | UniRef100_P49759                                                                                                         | LTHTDLKPENILFVQSDYTEAYNPK          | Lys2                        | 1 | 4   |

|                  |                                                            |                                        |                             |    |     |
|------------------|------------------------------------------------------------|----------------------------------------|-----------------------------|----|-----|
| KHS1             | UniRef100_Q9Y4K4                                           | DIKGANILLTDHGDVK                       | Lys2                        | 0  | 6   |
| PAN3             | UniRef100_Q58A45                                           | VMDPTKILITGK                           | ATP<br>Protein<br>Kinase    | 0  | -5  |
| p38a             | UniRef100_Q16539                                           | QELNKTIWEVPER                          | Domain                      | 0  | 6   |
| SGK3             | UniRef100_Q96BR1                                           | FYAVKVLQK                              | Lys1                        | 0  | -5  |
| LOK              | UniRef100_Q94804                                           | NKETGALAAAKVIETK                       | Lys1                        | 0  | 1   |
| NEK9             | UniRef100_Q8TD19                                           | DIKTLNIFLTK                            | Lys2                        | 0  | -1  |
| MST1             | UniRef100_Q13043                                           | ETGQIVAIKQVPVESDLQEIIK                 | Lys1                        | 0  | 1   |
| SRC              | UniRef100_P12931                                           | VAIKTLKPGTMSPEAFLQEAQVMKK              | Lys1                        | 0  | -8  |
| AurA, AurB, AurC | UniRef100_Q14965,<br>UniRef100_Q9UQB9,<br>UniRef100_Q96GD4 | GKFGNVYLAR                             | ATP Loop                    | -1 | -4  |
| MARK2            | UniRef100_Q7KZ17                                           | EVAVKIIDKTQLNSSSLQK                    | Lys1                        | -1 | 3   |
| PLK1             | UniRef100_P53350                                           | CFEISDADTKEVFAGKIVPK                   | Lys1                        | -1 | -12 |
| MARK3            | UniRef100_P27448                                           | EVAIKIIDKTQLNPTSLSQK                   | Lys1                        | -1 | 0   |
| AurA             | UniRef100_Q14965                                           | FILALKVLFK                             | Lys1                        | -1 | -1  |
| CHK1             | UniRef100_B4DT73                                           | DIKPENLLLDER                           | Lys2                        | -1 | 4   |
| CLK2             | UniRef100_P49760                                           | LTHTDLKPENILFVNSDYELTYNLEK             | Lys2                        | -1 | -9  |
| ILK              | UniRef100_Q13418                                           | WQGNDIVVKVLK                           | Lys1                        | -1 | -9  |
| SRPK1, SRPK2     | UniRef100_P78362,<br>UniRef100_Q96SB4                      | FVAMKVVK                               | Lys1                        | -2 | 8   |
| p70S6K           | UniRef100_P23443                                           | DLKPENIMLNHQGHVK                       | Lys2                        | -2 | -3  |
| CK1d, CK1e       | UniRef100_P49674,<br>UniRef100_P48730                      | DVKPDNFLMGLGKK                         | Lys2                        | -2 | -19 |
| RSKL1            | UniRef100_Q96S38                                           | VLGVIDKVLVMDTR                         | ATP                         | -2 | -19 |
| FYN, SRC, YES    | UniRef100_P12931,<br>UniRef100_P07947,<br>UniRef100_P06241 | QGAKFPIKWTAPEAALYGR                    | Activation<br>Loop          | -2 | 0   |
| IRAK4            | UniRef100_Q9NWZ3                                           | DIKSANILLDEAFTAK                       | Lys2                        | -2 | -2  |
| NEK7             | UniRef100_Q8TDX7                                           | AACLDGVVPVALLK                         | Lys1                        | -2 | -14 |
| AGK              | UniRef100_Q53H12                                           | ATVFLNPAACKGK                          | ATP                         | -2 | 26  |
| PKN1             | UniRef100_Q16512                                           | DLKLDNLLLDTEGYVK                       | Lys2                        | -2 | 16  |
| PHKg2            | UniRef100_P15735                                           | ATGHEFAVKIMEVTAER                      | Lys1                        | -2 | -2  |
| MST4             | UniRef100_Q9P289                                           | TQQVVAIKIIDLEEADEIEDIQQEITVLSQCDSYVTK  | Lys1                        | -3 | 6   |
| ATR              | UniRef100_Q13535                                           | FYIMMCKPK                              | ATP<br>Protein<br>Kinase    | -3 | -24 |
| CK2a1            | UniRef100_P68400                                           | GGPNIITLADIVKDPVSR                     | Domain                      | -3 | -4  |
| CaMK2g           | UniRef100_Q13555                                           | TSTQEYAAKIINTK                         | Lys1                        | -3 | -1  |
| EGFR             | UniRef100_P00533                                           | IPVAIKELR                              | Lys1                        | -3 | -3  |
| CK1a             | UniRef100_P48729                                           | DIKPDNFLMGIGR                          | Lys2                        | -3 | -24 |
| PRPK             | UniRef100_Q96S44                                           | FLSGLLELVKQGAEAR                       | ATP Loop                    | -3 | -5  |
| NuaK2            | UniRef100_Q9H093                                           | LVAIKSIR                               | Lys1                        | -3 | -4  |
| ITPK1            | UniRef100_Q13572                                           | ESIFFNSHNVSKPESSSVLTELDKIEGVFERPSDEVIR | ATP                         | -4 | 1   |
| NuaK1            | UniRef100_Q60285                                           | VVAIKSIR                               | Lys1                        | -4 | 9   |
| SMG1             | UniRef100_Q96Q15                                           | DTVTIHSVGGTITILPTKTKPK                 | ATP                         | -4 | 3   |
| KHS2             | UniRef100_Q8IVH8                                           | NVNTGELAAIKVIK                         | Lys1                        | -4 | 0   |
| LOK              | UniRef100_Q94804                                           | DLKAGNVLMTLEGDIR                       | Lys2                        | -4 | -15 |
| MARK3, MARK4     | UniRef100_Q96L34,<br>UniRef100_P27448                      | EVAIKIIDK                              | Lys1                        | -4 | -9  |
| JAK1 domain2     | UniRef100_P23458                                           | IGDFGLTKAIETDKEYYTVK                   | Activation<br>Loop          | -4 | -16 |
| CHK1             | UniRef100_B4DT73                                           | LSKGDGLEFK                             | Protein<br>Kinase<br>Domain | -4 | -1  |
| ABL, ARG         | UniRef100_P00519,<br>UniRef100_P42684                      | LMTGDTYTAHAGAKFPIK                     | Activation<br>Loop          | -5 | -17 |
| DNAPK            | UniRef100_P78527                                           | EHPFLVKGGEDLR                          | ATP                         | -5 | 0   |

|            |                  |                                     |                    |     |     |
|------------|------------------|-------------------------------------|--------------------|-----|-----|
| NDR2       | UniRef100_Q9Y2H1 | DTGHIYAMKILR                        | Lys1               | -5  | -2  |
| PRP4       | UniRef100_Q13523 | CNILHADIKPDNILVNESK                 | Lys2               | -6  | 1   |
| TBK1       | UniRef100_Q9UHD2 | TGDLFAIKVFNNISFLRPVDVQMR            | Lys1               | -7  | -1  |
| HER3/ErbB3 | UniRef100_P21860 | GVWIPEGESIKIPVCIKVIEDK              | Lys1               | -7  | 20  |
| MAP2K5     | UniRef100_Q13163 | DVKPSNMLVNTR                        | Lys2               | -7  | 3   |
| SRC        | UniRef100_P12931 | VAIKTLKPGTMSPEAFLQEAQVMK            | Lys1               | -8  | -21 |
| MST3       | UniRef100_Q9Y6E0 | VVAIKIIDLEEADEIEDIQEITVLSQCDSPPYVTK | Lys1               | -8  | -8  |
| SRPK1      | UniRef100_Q96SB4 | IIHTDIKPENILLSVNEQYIR               | Lys2               | -8  | -8  |
| CSK        | UniRef100_P41240 | VSDFGLTKEASSTQDTGKLPVK              | Activation<br>Loop | -8  | -6  |
| CHK2       | UniRef100_O96017 | VAIKIISK                            | Lys1               | -8  | 8   |
| SMG1       | UniRef100_Q96Q15 | SYPYLFKGLLEDLHLDER                  | ATP                | -9  | -13 |
| KHS1       | UniRef100_Q9Y4K4 | NVHTGELAAVKIIK                      | Lys1               | -9  | -4  |
| LRRK2      | UniRef100_Q5S007 | DLKPHNVLLFTLYPNAAIIAK               | Lys2               | -9  | -9  |
| PKN1       | UniRef100_Q16512 | VLLSEFRPSGELFAIKALK                 | Lys1               | -9  | -15 |
| ARAF       | UniRef100_P10398 | DLKSNNIFLHEGLTVK                    | Lys2               | -10 | -11 |
| MLKL       | UniRef100_Q8NB16 | APVAIKVFK                           | Lys1               | -10 | -3  |
| CaMK2d     | UniRef100_Q13557 | IPTGQEYAAKIINTKK                    | Lys1               | -10 | -1  |
| PIK3C3     | UniRef100_Q8NEB9 | TEDGGKYPVIFKHGDDLQRDQLILQIISLMDK    | ATP                | -10 | -6  |
| HER2/ErbB2 | UniRef100_P04626 | LLDIDETEHADGGKVPIK                  | Activation<br>Loop | -12 | -18 |
| NEK3       | UniRef100_P51956 | SKNIFLTQNGK                         | Activation<br>Loop | -13 | -11 |
| EphA2      | UniRef100_P29317 | EVPVAIKTLK                          | Lys1               | -13 | -8  |
| PKCi       | UniRef100_P41743 | IYAMKVVK                            | Lys1               | -13 | 0   |
| MAPKAPK3   | UniRef100_Q16644 | QVLGLGVNGKVLECFHR                   | ATP Loop           | -14 | -14 |
| DGKA       | UniRef100_P23743 | IDPVPNTHPLLVFVNPKSGGK               | ATP                | -18 | 4   |
| STLK6      | UniRef100_Q9C0K7 | SIKASHILISGDGLVTLGSLHLSLVK          | Lys2               | -21 | -5  |
| MELK       | UniRef100_Q14680 | DLKPENLLFDEYHK                      | Lys2               | -21 | -47 |
| PRP4       | UniRef100_Q13523 | ANQEVAVKIIR                         | Lys1               | -23 | -49 |
| PI4KB      | UniRef100_Q9UBF8 | LLSVIVKCGDDLQELLAQVQLK              | ATP                | -25 | -10 |
| SGK3       | UniRef100_Q96BR1 | IVYRDLKPENILLDSVGHVVLTFGLCK         | Lys2               | -27 | -7  |
| HER2/ErbB2 | UniRef100_P04626 | GIWIPDGENVKIPVAIKVLR                | Lys1               | -34 | -41 |
| LYN        | UniRef100_P07948 | EGAKFPIKWTAPEAINFGCFTIK             | Activation<br>Loop | -54 | -43 |

| Uniprot Accession | Protein                                             | Counts of replicate with Ratio $\geq$ 3 | Average #unique peptide | Probes $\geq$ 2 replicate | Probes 1 replicate | Probe @ 100 nM |
|-------------------|-----------------------------------------------------|-----------------------------------------|-------------------------|---------------------------|--------------------|----------------|
| Q9NYV4-1          | Cyclin-dependent kinase 12                          | 24                                      | 2.5                     | all                       |                    | yes            |
| A0A024R8S5        | Protein disulfide-isomerase                         | 21                                      | 35.1                    | all                       |                    | yes            |
| J3KNF8            | Cytochrome b5 type B                                | 19                                      | 4.1                     | all                       |                    | yes            |
| Q99808-2          | Isoform 2 of Equilibrative nucleoside transporter 1 | 17                                      | 3.0                     | all                       |                    | yes            |
| Q14004-1          | Cyclin-dependent kinase 13                          | 17                                      | 1.8                     | all                       |                    | yes            |
| A0A087WYF7        | MICOS complex subunit                               | 12                                      | 2.3                     | 4305, 4334                | 4241               | yes            |
| A0A0S2Z3F9        | Cyclin-dependent kinase 7                           | 12                                      | 1.8                     | all                       |                    | yes            |
| Q53G34            | Mitochondrial carrier homolog 2 variant             | 10                                      | 4.1                     | all                       |                    | yes            |
| Q9NQC3            | Reticulon-4                                         | 9                                       | 2.3                     | 4305, 4334                | 4241               | yes            |
| A0A024R6P6        | Chromosome 14 open reading frame 129                | 8                                       | 1.9                     | 4305, 4334                | 4241               | yes            |
| A0A024R8G6        | Sjogren's syndrome nuclear autoantigen 1            | 7                                       | 2.0                     | 4305                      |                    | yes            |
| B4DPG9            | cDNA FLJ59630                                       | 5                                       | 1.9                     | 4305                      | 4241               | yes            |
| A0A087WT44        | Heme oxygenase 2                                    | 11                                      | 5.3                     | all                       |                    | no             |
| Q9BTY7            | Protein HGH1 homolog                                | 10                                      | 5.7                     | 4305, 4334                |                    | no             |
| Q15418-2          | Isoform 2 of Ribosomal protein S6 kinase alpha-1    | 9                                       | 4.9                     | 4305, 4334                | 4241               | no             |
| Q53GI2            | Testis expressed sequence 264 variant               | 8                                       | 2.3                     | 4305, 4334                |                    | no             |
| Q8TCD1            | UPF0729 protein C18orf32                            | 8                                       | 1.2                     | 4305, 4334                |                    | no             |
| Q9NQC3-2          | Isoform 2 of Reticulon-4                            | 7                                       | 3.4                     | 4305, 4334                | 4241               | no             |
| Q8NBS9-1          | Thioredoxin domain-containing protein 5             | 5                                       | 5.3                     | 4305                      | 4241, 4334         | no             |
| O43765            | Small glutamine-rich tetratricopeptide repeat-      | 5                                       | 4.2                     | 4305                      | 4241, 4334         | no             |
| O00154            | Cytosolic acyl coenzyme A thioester hydrolase       | 5                                       | 3.3                     | 4305, 4334                | 4241               | no             |
| Q6L8Q7-1          | 2',5'-phosphodiesterase 12                          | 5                                       | 3.3                     | 4334                      | 4241, 4305         | no             |
| A0A024R0C0        | Choline/ethanolamine phosphotransferase 1           | 5                                       | 1.0                     | 4305                      | 4334               | no             |
| P49327            | Fatty acid synthase                                 | 4                                       | 20.3                    | 4334                      |                    | yes            |
| P12081            | Histidine--tRNA ligase, cytoplasmic                 | 4                                       | 7.4                     | 4305                      |                    | yes            |
| Q15084-2          | Isoform 2 of Protein disulfide-isomerase A6         | 4                                       | 7.3                     | 4305                      | 4334               | no             |
| Q8NBX0            | Saccharopine dehydrogenase-like oxidoreductase      | 4                                       | 3.8                     | 4305                      | 4334               | no             |
| Q9UBB4-1          | Ataxin-10                                           | 4                                       | 3.3                     | 4305                      | 4241               | no             |
| A0A0S2Z5D6        | Abhydrolase domain containing 5 isoform 1           | 4                                       | 1.0                     | 4334                      | 4305               | no             |
| P49841-2          | Isoform 2 of Glycogen synthase kinase-3 beta        | 4                                       | 1.0                     | 4305                      | 4334               | no             |
| Q01804-1          | OTU domain-containing protein 4                     | 4                                       | 1.0                     | 4305                      | 4334               | no             |
| A0A0S2Z5A6        | Transporter 1 ATP-binding cassette sub-family B     | 4                                       | 1.0                     | 4305                      | 4334               | no             |
| A0A024R3C7        | Ataxia telangiectasia mutated (Includes             | 4                                       | 1.0                     | 4305                      | 4334               | no             |
| Q59FM4            | Scavenger receptor class B member 1 variant         | 3                                       | 1.6                     | 4334                      | 4305               | yes            |
| A0A0S2Z4K2        | CCHC-type zinc finger nucleic acid binding protein  | 3                                       | 3.9                     | 4334                      | 4305               | no             |
| P16615            | Sarcoplasmic/endoplasmic reticulum calcium ATPase   | 3                                       | 2.9                     | 4305                      |                    | no             |
| Q6PJG6-1          | BRCA1-associated ATM activator 1                    | 3                                       | 2.1                     | 4305                      | 4241               | no             |
| B7Z6M0            | Peptidylprolyl isomerase                            | 3                                       | 1.6                     | 4305                      | 4334               | no             |
| P15814            | Immunoglobulin lambda-like polypeptide 1            | 3                                       | 1.3                     | 4305                      | 4334               | no             |
| A0A024QZN9        | Voltage-dependent anion channel 2                   | 2                                       | 9.9                     | 4305                      |                    | yes            |
| Q9NX40            | OClA domain-containing protein 1                    | 2                                       | 2.2                     | 4305                      |                    | no             |
| Q9UG56-3          | Phosphatidylserine decarboxylase proenzyme,         | 2                                       | 1.7                     | 4305                      |                    | no             |
| Q13257-1          | Mitotic spindle assembly checkpoint protein MAD2A   | 2                                       | 1.0                     | 4334                      |                    | no             |
| B7Z351            | Secreted phosphoprotein 1 variant 6                 | 2                                       | 1.0                     | 4305                      |                    | no             |
| Q92621            | Nuclear pore complex protein Nup205                 | 2                                       | 1.0                     | 4305                      |                    | no             |
| A0A0A0MTS7        | Titin                                               | 2                                       | 1.0                     | 4334                      |                    | no             |

**Table S2.** Ranked list of 46 proteins identified as SY-351 interactors in the ABPP experiments. The primary ranking criterion was the number of independent samples, of 27 total, for which corresponding peptide peaks were three-fold or larger in the presence of SY-351 (ratio of heavy:light peaks  $\geq$  3). In addition, proteins had a higher rank if they were identified in at least one incubation with 100 nM probe. In cases where proteins were equally strongly identified by these two criteria, the protein with a higher average number of unique peptides (sum of number of unique peptides from all samples in which at least one unique peptide was identified divided by the number of samples giving at least one unique peptide) was ranked higher. **CDK12 (1490 residues) and CDK13 (1512 residues) are favored in this ranking (vs. CDK7; 346 residues) because they are much larger proteins.**

| Gene      | Sites                                                | CDK7 | CDK8 | CDK9-Decker | CDK9-Sanso | CDK12/13 |
|-----------|------------------------------------------------------|------|------|-------------|------------|----------|
| SF3B1     | T326, T434, S349, T223, T227, T350, T273, T303, T313 | +    |      |             |            | +        |
| SF3B1     | T142, T267, T278                                     |      |      |             | +          | +        |
| SF3B1     | T227                                                 | +    | +    |             |            | +        |
| SF3B1     | S129                                                 |      | +    |             |            | +        |
| U2AF2     | S79                                                  | +    |      | +           |            |          |
| RBM25     | S677                                                 | +    |      | +           |            | +        |
| SRRM1     | T614, T616                                           |      |      | +           |            | +        |
| SRRM2     | S1694                                                | +    |      | +           |            |          |
| SRRM2     | S398                                                 |      | +    | +           |            |          |
| CASC3     | S125                                                 | +    |      |             |            | +        |
| CASC3     | S148                                                 |      | +    | +           |            |          |
| THRAP3    | S379                                                 | +    | +    | +           |            |          |
| THRAP3    | S575                                                 | +    | +    |             |            |          |
| SRSF9     | S216                                                 |      | +    | +           |            |          |
| DGCR14    | T3                                                   | +    | +    |             |            |          |
| PRRC2A    | S456                                                 | +    |      | +           |            |          |
| PRPF4B    | S294                                                 |      | +    | +           |            |          |
| ESF1      | S694                                                 |      | +    |             |            | +        |
| DDX21     | S71                                                  | +    | +    |             |            | +        |
| MATR3     | S195, 206                                            | +    |      |             |            | +        |
| MEPCE     | T213                                                 | +    |      |             | +          | +        |
| MEPCE     | S217                                                 |      |      |             | +          | +        |
| CDC5L     | T438                                                 | +    |      |             |            | +        |
| CDC5L     | T442                                                 | +    |      |             | +          | +        |
| TMPO      | S67                                                  |      | +    | +           |            |          |
| FAM122B   | S119                                                 |      | +    | +           |            |          |
| NELFE     | S115                                                 | +    |      | +           |            |          |
| SUPT5H    | S666                                                 | +    |      |             | +          |          |
| GATAD2B   | S135                                                 | +    | +    |             |            |          |
| DIDO1     | S1456                                                | +    |      | +           |            |          |
| IRF2BP1   | S186                                                 |      | +    |             | +          |          |
| FOXK1     | S428                                                 | +    |      |             | +          |          |
| AGFG1     | T177, S181                                           | +    |      |             |            | +        |
| SEC22B    | S137                                                 | +    | +    |             |            |          |
| HUWE1     | S2362                                                | +    |      | +           |            |          |
| ARFGEF1   | S1566, S1569                                         | +    |      | +           |            |          |
| TBC1D110B | S687                                                 | +    |      | +           |            |          |

**Table S3.** Summary table for phosphoproteins that contained at least one significantly decreased phospho-site ( $q < 0.01$ ) with SY-351 treatment. Phosphoproteins that have been identified as substrates for CDK7 and other CDK transcriptional kinases are shown in (+): CDK8 (Poss et al. 2016), CDK9 (Sanso et al. 2016; Decker et al. 2019), and CDK12/13 (Krajewska et al. 2019).

**Table S4.** SILAC-MS data (Excel file)

## Synthesis of chemical compounds

SY-351 was prepared as described (Hu et al. 2019).

**ABPP probes:** SY-4241, SY-4305, and SY-4334 were synthesized as outlined below. These compounds inhibited CDK7/CCNH/MAT1 in enzymatic activity assays with IC<sub>50</sub> values of 295 nM, 42 nM, and 81 nM, respectively with K<sub>m</sub> [ATP].

### Synthesis of SY-4241:

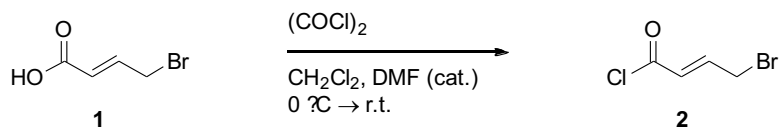

**(E)-4-bromobut-2-enoyl chloride (2):** Oxalyl chloride (0.264 mL, 3.03 mmol) was added to a stirring solution of (E)-4-bromobut-2-enoic acid (**1**) (500 mg, 3.03 mmol) in dichloromethane (10 mL) and *N,N*-dimethylformamide (20  $\mu$ L) at 0 °C and left stirring for 2 hours at room temperature (complete conversion by LCMS by quenching with diethylamine to confirmed the acyl chloride formation). The solution was used as such in the next step.

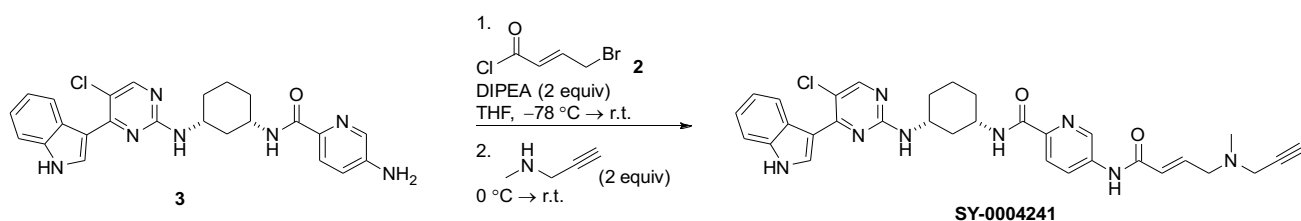

**N-((1S,3R)-3-((5-chloro-4-(1H-indol-3-yl)pyrimidin-2-yl)amino)cyclohexyl)-5-((E)-4-(methyl(prop-2-yn-1-yl)amino)but-2-enamido)picolinamide (SY-4241):** To a round bottom flask, 5-amino-N-((1S,3R)-3-((5-chloro-4-(1H-indol-3-yl)pyrimidin-2-yl)amino)cyclohexyl)picolinamide (200 mg, 0.43 mmol) was dissolved in tetrahydrofuran (1.45 mL) and cooled to -78 °C. The solution was treated with a freshly made solution of (E)-4-bromobut-2-enoyl chloride (1.45 mL, 0.43 mmol, 0.3 M). The solution was then left to warm to room temperature. After an hour, conversion to the amide was complete. The solution was cooled to 0 °C and *N*-methylpropargylamine (0.073 mL, 0.87 mmol) was added and then left to warm to room temperature. After 1 hour, the solution was diluted with water and extracted twice with 2-methyltetrahydrofuran. The combined organic layer was dried over sodium sulfate and evaporated under vacuum. The crude mixture was purified via reverse phase column chromatography (30 g) using 10 – 70 % MeCN / 10 mM AMF aq as eluent (compound came out with 55%). The pure fractions were combined and volatiles were removed under reduced pressure. The remaining aqueous phase was extracted twice with 2-methyltetrahydrofuran, dried over sodium sulfate, filtered and evaporated under reduced pressure. The crude mixture was then dissolved in EtOAc, dried again over sodium sulfate, filtered and evaporated under reduced pressure. The desired product was obtained in 80 % purity. The impure mixture was then re-purified via reverse phase column chromatography (12 g) using 20 – 60 % MeCN / water as eluent. Pure fractions were combined, frozen and lyophilized for 16 hours. The desired product N-((1S,3R)-3-((5-chloro-4-(1H-indol-3-yl)pyrimidin-2-yl)amino)cyclohexyl)-5-((E)-4-(methyl(prop-2-yn-1-yl)amino)but-2-enamido)picolinamide (**SY-4241**) was obtained as an off-white amorphous solid (34.2 mg, 0.057 mmol) 13 % yield, 97.7 % purity.

**LCMS M+H (m/z) = 597.2** R<sub>T</sub> = 1.56 min (5 – 100 % MeCN / 10 mM AmF aq., 3 min.)

**<sup>1</sup>H NMR** (400 MHz, CDCl<sub>3</sub>)  $\delta$  8.66 (s br, 1H), 8.64 – 8.50 (m, 2H), 8.37 (s, 1H), 8.24 – 8.21 (m, 1H), 8.21 – 8.16 (m, J = 4.3 Hz, 2H), 7.89 – 7.76 (m, 1H), 7.46 – 7.41 (m, 1H), 7.38 – 7.34 (m, 1H), 7.33 – 7.29 (m, 3H), 7.05 – 6.96 (m, 1H), 6.19 (d, J = 15.2 Hz, 1H), 5.03 (d, J = 8.2 Hz, 1H), 4.28 – 4.00 (m,



2H), 3.37 (d, J = 2.4 Hz, 2H), 3.28 (dd, J = 5.9, 1.5 Hz, 2H), 2.65 – 2.55 (m, 1H), 2.36 (s, 3H), 2.31 – 2.23 (m, 2H), 2.21 – 2.12 (m, 1H), 1.92 (dd, J = 10.7, 3.4 Hz, 1H), 1.66 – 1.61 (m, 1H), 1.54 – 1.46 (m, 1H), 1.39 – 1.14 (m, 4H).

*Synthesis of SY-4305:*

**Step 1:**

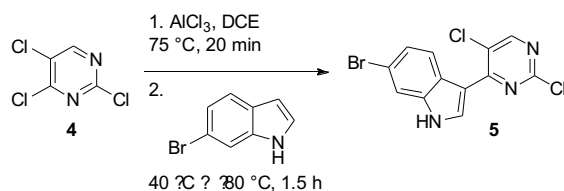

**6-bromo-3-(2,5-dichloropyrimidin-4-yl)-1H-indole (5):** To a round bottom flask, 2,4,5-trichloropyrimidine (**4**) (1.00 g, 5.45 mmol) was suspended in 1,2-dichloroethane and purged under nitrogen atmosphere. Aluminum trichloride (1.03 g, 5.24 mmol) was then added and the suspension was stirred at 75 °C for 20 min to give a faint orange suspension. After 20 mins, the reaction was cooled to 40 °C and 6-bromoindole (1.03 g, 5.50 mmol) was then added. The flask was then equipped with a condenser and the solution was heated to 80 °C for 1.5 hour. The resulting dark brown suspension was added portion-wise to 100 mL of ice with stirring and the remaining residues were partitioned between a minimum of 2-methyltetrahydrofuran and water (1:1 v/v). Once the ice had completely melted, the resulting solution was extracted twice with 2-methyltetrahydrofuran. The combined organic phase was dried over sodium sulfate, filtered and dried under vacuum. The resulting crude solid (85 % purity) was suspended in 10 mL of tert-butylmethylether, sonicated for 3 minutes and stirred vigorously (500 rpm) for 5 minutes. The solid was filtered, washed with a minimum of tert-butylmethylether (2 mL) and dried under vacuum. The desired product 6-bromo-3-(2,5-dichloropyrimidin-4-yl)-1H-indole (**5**) was obtained as a brown amorphous solid (1.13 g, 3.28 mmol), 63 % yield, 99 % purity.

**LCMS:** *m/z* (+H<sup>+</sup>) = 341.9, R<sub>T</sub> = 1.95 min (5 – 100 % MeCN / 10 mM AmF aq., 3 min)

**<sup>1</sup>H NMR** (400 MHz, DMSO-*d*<sub>6</sub>) δ 12.31 (s br, 1H), 8.76 (s, 1H), 8.72 (d, J = 3.2 Hz, 1H), 8.41 (d, J = 8.7 Hz, 1H), 7.75 – 7.70 (m, 1H), 7.39 (dd, J = 8.7, 1.9 Hz, 1H).

**Step 2:**

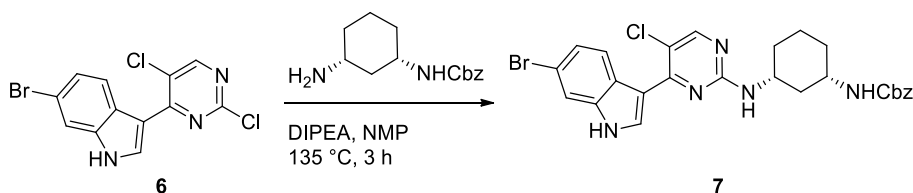

**benzyl**

**((1S,3R)-3-((4-(6-bromo-1H-indol-3-yl)-5-chloropyrimidin-2-**

**yl)amino)cyclohexyl)carbamate (6):** To a suspension of 6-bromo-3-(2,5-dichloropyrimidin-4-yl)-1H-indole (0.756 g, 2.20 mmol) in NMP (2.75 mL) was added benzyl ((1S,3R)-3-aminocyclohexyl)carbamate (**5**) (0.574 g, 2.31 mmol) and diisopropylethylamine (1.15 mL, 6.61 mmol). The resulting mixture was heated to 135 °C for 1.5 hours using an oil bath. The reaction was then cooled down to room temperature and added dropwise to an aqueous HCl solution (6.0 mL conc. HCl / 50 mL water). The resulting beige suspension was filtered and rinsed with water. The cake was then dried under vacuum, triturated in 50 mL of acetonitrile, filtered, dried again under vacuum. The desired product benzyl ((1S,3R)-3-((4-(6-bromo-1H-indol-3-yl)-5-chloropyrimidin-2-yl)amino)cyclohexyl)carbamate (**6**) was obtained as a brown amorphous solid (0.87 g, 71.52 mmol), 72% yield, 78 % purity.

**LCMS:** M+H ( $m/z$ ) = 555.9,  $R_T$  = 1.95 min (5 – 100 % MeCN / 10 mM AmF aq., 3 min)

### Step 3:

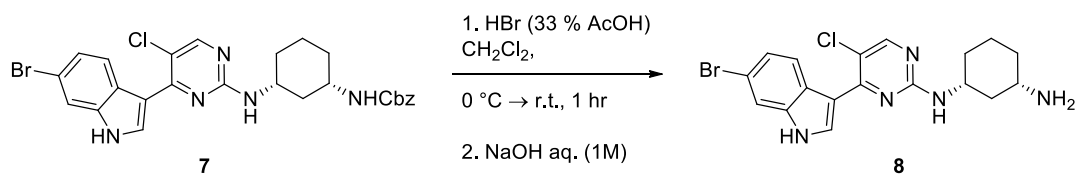

**(1R,3S)-N1-(4-(6-bromo-1H-indol-3-yl)-5-chloropyrimidin-2-yl)cyclohexane-1,3-diamine (7):** To a suspension of benzyl ((1S,3R)-3-((4-(6-bromo-1H-indol-3-yl)-5-chloropyrimidin-2-yl)amino)cyclohexyl)carbamate (**6**) (0.7842 g, 1.41 mmol) in dichloromethane (10 mL) in an ice bath. The mixture was then treated with HBr solution (2.5 mL, 33 % in AcOH). The mixture was allowed to warm to room temperature and left to stir for 2 hours. The mixture was then added portion-wise to *tert*-butylmethylether (100 mL) and left to stir overnight. The next morning, the precipitate was filtered, washed with *tert*-butylmethylether, and dried under vacuum. The desired product (1R,3S)-N<sup>1</sup>-(4-(6-bromo-1H-indol-3-yl)-5-chloropyrimidin-2-yl)cyclohexane-1,3-diamine ammonium bromide was obtained as amorphous dark yellow solid (0.755 g, 1.51 mmol), 97 % purity. The solid was then suspended in 2-methyltetrahydrofuran and partitioned with NaOH aq (1M) in a separatory funnel. The aqueous phase was extracted twice with 2-methyltetrahydrofuran. The combined organic phase was dried over sodium sulfate, filtered and evaporated under vacuum. The desired product (1R,3S)-N<sup>1</sup>-(4-(6-bromo-1H-indol-3-yl)-5-chloropyrimidin-2-yl)cyclohexane-1,3-diamine (**7**) was obtained as a brown amorphous solid (0.4942 g, 1.17 mmol), 83 % yield. 90 % purity.

**LCMS:** M+H ( $m/z$ ) = 420.1,  $R_T$  = 1.39 min (5 – 100 % MeCN / 10 mM AmF aq., 3 min)

### Step 4:

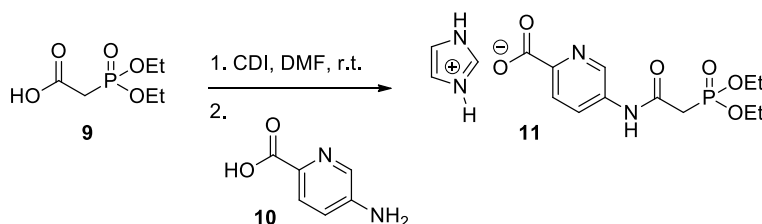

**1H-imidazol-3-ium 5-(2-(diethoxyphosphoryl)acetamido)picolinate (10):** To a round bottom flask, 2-(diethoxyphosphoryl)acetic acid (**8**) (92.33 g, 471 mmol) was dissolved in *N,N*-dimethylformamide (471 mL, 1.0 M) to which was added *N,N*-carbonyldiimidazole (77.09 g, 475 mmol) in small portions and the solution is stirred under nitrogen atmosphere. After 60 minutes, 5-aminopyridine-2-carboxylic acid (**9**) (65.02 g, 471 mmol) was added and the solution was left to stir at room temperature overnight. The next morning the precipitate was filtered, washed with acetone (500 mL) and dried under vacuum. The desired product (**10**) was obtained as a white amorphous solid (118 g, 306 mmol), 65 % yield, 99 % purity by LCMS. 95 % purity by <sup>1</sup>H NMR; traces of *N,N*-dimethylformamide.

**LCMS:** M+H ( $m/z$ ) = 317.15,  $R_T$  = 0.88 min (5 – 100 % MeCN / 10 mM AmF aq., 3 min)

**<sup>1</sup>H NMR** (500 MHz, DMSO-*d*<sub>6</sub>)  $\delta$  10.67 (s, 1H), 8.78 (dd,  $J$  = 2.5, 0.5 Hz, 1H), 8.21 (dd,  $J$  = 8.6, 2.5 Hz, 1H), 8.04 (d,  $J$  = 8.5 Hz, 1H), 7.67 (s, 1H), 7.03 (d,  $J$  = 1.0 Hz, 2H), 5.21 (s br, 1H) 4.23 – 3.93 (m, 4H), 3.16 (d,  $J$  = 21.5 Hz, 2H), 1.24 (t,  $J$  = 7.1 Hz, 6H).

### Step 5:

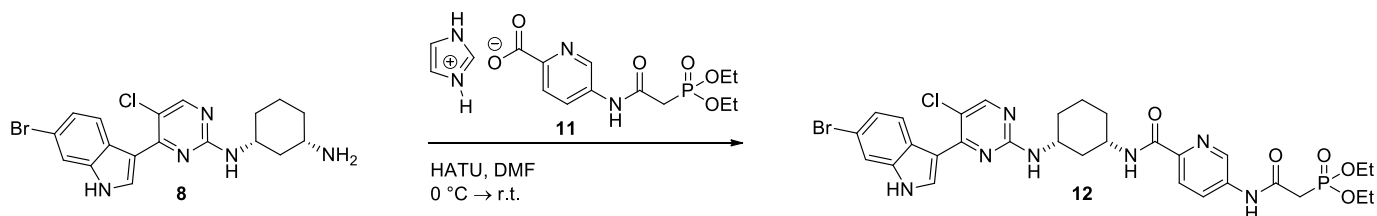

**diethyl (2-((6-(((1S,3R)-3-((4-(6-bromo-1H-indol-3-yl)-5-chloropyrimidin-2-yl)amino)cyclohexyl)carbamoyl)pyridin-3-yl)amino)-2-oxoethyl)phosphonate (11):** To a round bottom flask, 1H-imidazol-3-ium 5-(2-(diethoxyphosphoryl)acetamido)picolinate (**10**) (0.4948 g, 1.29 mmol) was suspended in *N,N*-dimethylformamide (2.8 mL). To this solution DIPEA (0.41 mL, 2.34 mmol) was added and the solution was stirred until all was dissolved. The solution was then cooled to 0 °C and 1-[bis(dimethylamino)methylene]-1H-1,2,3-triazolo[4,5-b]pyridinium-3-oxid-hexafluorophosphate (HATU) (0.4895 g, 1.29 mmol) was added. The reaction was stirred under nitrogen atmosphere for 5 minutes and turned bright yellow. Following this, (1R,3S)-N1-(4-(6-bromo-1H-indol-3-yl)-5-chloropyrimidin-2-yl)cyclohexane-1,3-diamine (**7**) (0.4924 g, 1.17 mmol) was dissolved in *N,N*-dimethylformamide and added to the solution. The reaction was stirred and left to slowly warmed up to room temperature. After 1h, the resulting mixture was then added dropwise to water (20 mL) and stirred vigorously (>800 rpm). Cold water (10 mL) was then added and the mixture was stirred overnight. The resulting beige precipitate was then filtered, washed with water (50 mL) and dried under vacuum. The product (**11**) was obtained as a yellow amorphous solid (0.713 g, 0.99 mmol) 85 % yield, 79 % purity.

**LCMS:** M+H (*m/z*) = 717.9, 720.0, 721.0,  $R_T$  = 1.69 min (5 – 100 % MeCN / 10 mM AmF aq., 3 min)

### Step 6:

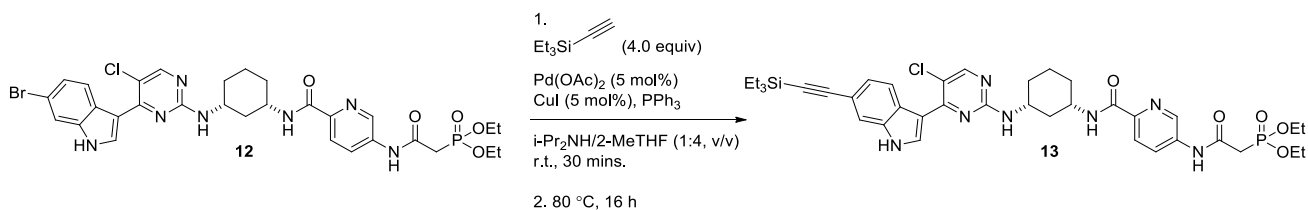

**diethyl (2-((6-(((1S,3R)-3-((5-chloro-4-(6-((triethylsilyl)ethynyl)-1H-indol-3-yl)pyrimidin-2-yl)amino)cyclohexyl)carbamoyl)pyridin-3-yl)amino)-2-oxoethyl)phosphonate (12):** To a solution of diethyl (2-((6-(((1S,3R)-3-((4-(6-bromo-1H-indol-3-yl)-5-chloropyrimidin-2-yl)amino)cyclohexyl)carbamoyl)pyridin-3-yl)amino)-2-oxoethyl)phosphonate (**11**) (300 mg, 0.417 mmol) in *i*-Pr<sub>2</sub>NH / THF (4.17 mL, 1:4 v/v) under a nitrogen atmosphere were added catalytic amounts of Cul (2.7 mg, 5 mol%), Pd(OAc)<sub>2</sub> (4.7 mg, 5 mol%), and triphenylphosphine (27.4 mg, 25 mol%). The solution was stirred for 30 minutes at room temperature, and then trimethylsilylethyne (234.2 mg, 1.67 mmol) was added under vigorous stirring. The reaction mixture was then heated to 80 °C overnight. After being cooled to room temperature, the mixture was filtered, washed with methanol and concentrated under vacuum. The crude mixture was purified by normal phase column chromatography using 0 – 10 % MeOH / dichloromethane as eluent. The desired product (**12**) was obtained as a white amorphous solid (187 mg, 0.24 mmol), 99 % purity, 58 % isolated yield.

**LCMS** M+H (*m/z*) = 778.1, 779.0, 781.4,  $R_T$  = 2.13 min (5 – 100 % MeCN / 10 mM AmF aq., 3 min)

**<sup>1</sup>H NMR** (400 MHz, DMSO-*d*<sub>6</sub>) δ 12.12 (d, *J* = 142.7 Hz, 1H), 10.62 (s, 1H), 8.77 (dd, *J* = 12.5, 2.5 Hz, 1H), 8.55 (dd, *J* = 9.3, 5.8 Hz, 3H), 8.27 (s, 1H), 8.19 (dd, *J* = 8.6, 2.4 Hz, 1H), 8.02 (dd, *J* = 8.6, 4.3

Hz, 1H), 7.59 (s, 1H), 7.53 – 7.08 (m, 2H), 4.13 – 3.97 (m, 4H), 3.14 (d, J = 21.5 Hz, 2H), 2.21 (s, 1H), 2.03 (d, J = 40.4 Hz, 1H), 1.82 (s, 2H), 1.62 – 1.35 (m, 3H), 1.21 (dt, J = 14.3, 7.4 Hz, 8H), 1.04 (dd, J = 11.0, 4.7 Hz, 8H), 0.97 (dd, J = 10.2, 5.3 Hz, 1H), 0.76 – 0.58 (m, 6H).

### Step 7:

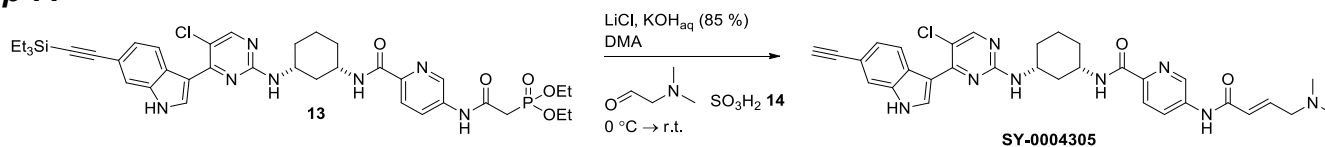

**N-((1S,3R)-3-((5-chloro-4-(6-ethynyl-1H-indol-3-yl)pyrimidin-2-yl)amino)cyclohexyl)-5-((E)-4-(dimethylamino)but-2-enamido)picolinamide (SY-4305):** To a 10 mL round bottom flask, diethyl (2-((6-(((1S,3R)-3-((5-chloro-4-(6-((triethylsilyl)ethynyl)-1H-indol-3-yl)pyrimidin-2-yl)amino)cyclohexyl)carbonyl)pyridin-3-yl)amino)-2-oxoethyl)phosphonate (**12**) (187 mg, 0.240 mmol) was dissolved in *N,N*-dimethylacetamide (2.40 mL). The reaction was stirred under nitrogen atmosphere. To this solution was added lithium chloride monohydrate (11.2 mg, 0.264 mmol) and the solution was stirred until dissolved. To the solution, 85 % KOH in water (1.15 mL, 24.1 mmol) was added and the reaction was left to stir at room temperature. After 15 minutes, 1.15 mL of *N,N*-dimethylaminoacetaldehyde solution in water (**13**) (0.102 g, 0.601 mmol, 0.52 M) was added dropwise. The reaction was then left to warm to room temperature and was monitored by LCMS until judged complete. The crude solution was then added dropwise to 25 mL of water under vigorous stirring (>500 rpm). The milky solution was then partitioned with 2-methyltetrahydrofuran and extracted twice (2 X 50 mL). The combined organic layer was then dried over sodium sulfate, filtered and evaporated under vacuum. The crude mixture was then purified via reverse phase column chromatography (25 g) using 10 – 60 % MeCN / 10 mM AmF. The pure fractions were then combined, frozen and lyophilized over two days. The desired compound was obtained as a off-white amorphous solid (42 mg, 0.07 mmol), 91 % purity, 29 % isolated yield. The compound was re-purified by reverse-phase column chromatography (12 g) using 20 – 60 % MeCN / 10 mM AmF aq., as eluent. Pure fractions were combined, frozen and lyophilized over two days. The desired compound (**SY-4305**) was obtained as a yellow amorphous solid (26.1 mg, 0.0437 mmol), 99 % purity, 18.19 % isolated yield.

**LCMS M+H (*m/z*) = 597.0, 599.0, 600.2,  $R_T$  = 1.48 min (5 – 100 % MeCN / 10 mM AMF aq., 3 min.)**

**$^1\text{H NMR}$  (400 MHz, DMSO- $d_6$ )  $\delta$  11.97 (s, 1H), 10.56 (s, 1H), 8.88 (d, J = 2.4 Hz, 1H), 8.55 (t, J = 5.9 Hz, 3H), 8.35 – 8.17 (m, 3H), 8.01 (d, J = 8.6 Hz, 1H), 7.61 (s, 1H), 7.38 (d, J = 7.5 Hz, 2H), 6.80 (dt, J = 15.4, 5.8 Hz, 1H), 6.29 (d, J = 15.4 Hz, 1H), 4.10 (s, 1H), 3.90 (s, 2H), 3.07 (dd, J = 5.7, 1.3 Hz, 2H), 2.55 (s, 1H), 2.45 (s, 1H), 2.27 – 2.09 (m, 9H), 1.99 (s, 2H), 1.82 (s, 3H), 1.43 (s, 4H), 1.26 (d, J = 21.9 Hz, 1H).**

### Synthesis of SY-4334:

#### Step 1:

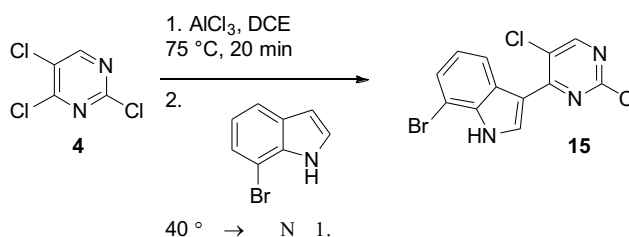

**7-bromo-3-(2,5-dichloropyrimidin-4-yl)-1H-indole:** To a rbf, 2,4,5-trichloropyrimidine (**4**) (1.00 g, 5.45 mmol) was suspended in 1,2-dichloroethane and purged under nitrogen atmosphere. Aluminum

trichloride (1.03 g, 5.24 mmol) was then added and the suspension was stirred at 75 °C for 20 min to give a faint orange suspension. After 20 minutes, the reaction was cooled to 40 °C and 7-bromoindole (1.03 g, 5.50 mmol) was then added. The flask was then equipped with a condenser and the solution was heated to 80 °C for 1.5 hour. The resulting dark brown suspension was added portion-wise to 100 mL of ice with stirring and the remaining residues were partitioned between a minimum of 2-methyltetrahydrofuran and water (1:1 v/v). Once completely melted, the resulting solution was extracted twice with 2-methyltetrahydrofuran. The combined organic phase was dried over sodium sulfate, filtered and dried under vacuum. The resulting crude solid (85 % purity) was suspended in 10 mL of tert-butylmethylether, sonicated for 3 minutes and stirred vigorously (500 rpm) for 5 minutes. The solid was filtered, washed with a minimum of tert-butylmethylether (2 mL) and dried under vacuum. The desired product 7-bromo-3-(2,5-dichloropyrimidin-4-yl)-1H-indole (**15**) was obtained as a brown amorphous solid (1.31 g, 3.82 mmol), 73 % yield, 99 % purity.

**LCMS:** M+H ( $m/z$ ) = 342.1, 344.0, 345.9,  $R_T$  = 1.91 min (5 – 100 % MeCN / 10 mM AmF aq., 3 min)  
**<sup>1</sup>H NMR** (400 MHz, DMSO- $d_6$ )  $\delta$  12.48 (s, 1H), 8.80 (d,  $J$  = 0.5 Hz, 1H), 8.62 (d,  $J$  = 3.3 Hz, 1H), 8.49 (d,  $J$  = 8.0 Hz, 1H), 7.51 (dd,  $J$  = 7.7, 0.9 Hz, 1H), 7.29 – 7.09 (m, 1H).

### Step 2:

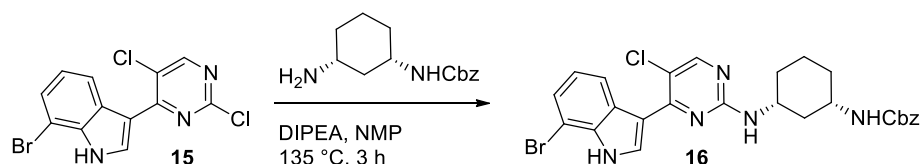

**benzyl ((1S,3R)-3-((4-(7-bromo-1H-indol-3-yl)-5-chloropyrimidin-2-yl)amino)cyclohexyl)carbamate (16):** To a suspension of 7-bromo-3-(2,5-dichloropyrimidin-4-yl)-1H-indole (**15**) (1.31 g, 3.82 mmol) in NMP (4.75 mL) was added benzyl ((1S,3R)-3-aminocyclohexyl)carbamate (1.42 g, 5.73 mmol) and diisopropylethylamine (2.00 mL, 11.46 mmol). The resulting mixture was heated to 135 °C for 4 hours using an oil bath. The reaction was then cooled down to room temperature and added dropwise to an aqueous HCl solution (12.0 mL conc. HCl / 100 mL water). The resulting beige suspension was filtered and rinsed with water. The cake was then dried under vacuum, triturated in 50 mL of acetonitrile, filtered, dried again under vacuum. The desired product benzyl ((1S,3R)-3-((4-(6-bromo-1H-indol-3-yl)-5-chloropyrimidin-2-yl)amino)cyclohexyl)carbamate (**16**) was obtained as a yellow amorphous solid (1.75 g, 31.50 mmol), 83% yield, 98 % purity.

**LCMS:** M+H ( $m/z$ ) = 555.7,  $R_T$  = 1.95 min (5 – 100 % MeCN / 10 mM AmF aq., 3 min)

### Step 3:

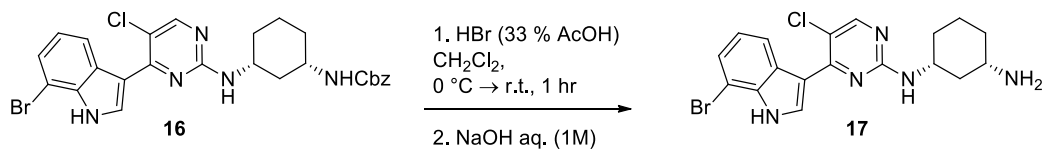

**(1R,3S)-N1-(4-(7-bromo-1H-indol-3-yl)-5-chloropyrimidin-2-yl)cyclohexane-1,3-diamine (17):** (1R,3S)-N1-(4-(7-bromo-1H-indol-3-yl)-5-chloropyrimidin-2-yl)cyclohexane-1,3-diamine ammonium bromide: To a suspension of benzyl ((1S,3R)-3-((4-(7-bromo-1H-indol-3-yl)-5-chloropyrimidin-2-yl)amino)cyclohexyl)carbamate **16** (1.75 g, 3.15 mmol) in dichloromethane (20 mL) in an ice bath. The mixture was then treated with HBr solution (5.0 mL, 33 % in AcOH). The mixture was allowed to warm to room temperature and left to stir for 2 hours. The mixture was then added portion-wise to *tert*-

butylmethylether (200 mL) and left to stir for 2 hours. The precipitate was filtered, washed with *tert*-butylmethylether, and dried under vacuum. The desired product (1*R*,3*S*)-*N*1-(4-(7-bromo-1*H*-indol-3-yl)-5-chloropyrimidin-2-yl)cyclohexane-1,3-amine ammonium bromide was obtained as amorphous yellow solid (1.76 g, 3.45 mmol), 99 % purity. The solid was then suspended in 2-methyltetrahydrofuran and partitioned with NaOH aq (1M) in a separatory funnell. The aqueous phase was extracted twice with 2-methyltetrahydrofuran. The combined organic phase was dried over sodium sulfate, filtered and evaporated under vacuum. The desired product (1*R*,3*S*)-*N*1-(4-(7-bromo-1*H*-indol-3-yl)-5-chloropyrimidin-2-yl)cyclohexane-1,3-diamine (**17**) was obtained as a off-white amorphous solid (1.23 g, 2.92 mmol), 92 % yield. 98 % purity.

**LCMS:** M+H (*m/z*) = 421.9, *R*<sub>T</sub> = 1.37 min (5 – 100 % MeCN / 10 mM AmF aq., 3 min)

#### Step 4:

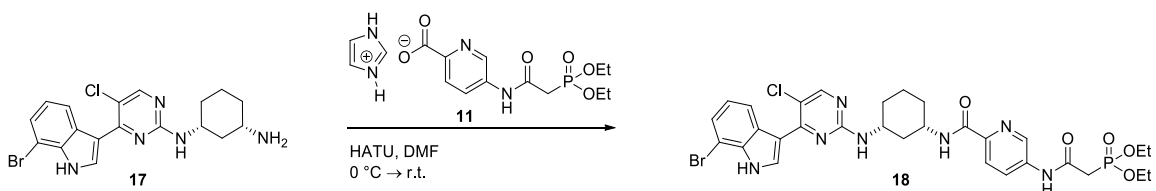

**diethyl (2-((6-(((1*S*,3*R*)-3-((4-(7-bromo-1*H*-indol-3-yl)-5-chloropyrimidin-2-yl)amino)cyclohexyl)carbamoyl)pyridin-3-yl)amino)-2-oxoethyl)phosphonate (**18**):** To a round bottom flask, 1*H*-imidazol-3-ium 5-(2-(diethoxyphosphoryl)acetamido)picolinate (**10**) (1.24 g, 3.22 mmol) was suspended in *N,N*-dimethylformamide (7.5 mL). To this solution DIPEA (1.02 mL, 5.85 mmol) was added and the solution was stirred until all was dissolved. The solution was then cooled to 0 °C and 1-[bis(dimethylamino)methylene]-1*H*-1,2,3-triazolo[4,5-*b*]pyridinium-3-oxid-hexafluorophosphate (HATU) (1.22 g, 1.22 mmol) was added. The reaction was stirred under nitrogen atmosphere for 5 minutes and turned bright yellow. Following this, (1*R*,3*S*)-*N*1-(4-(7-bromo-1*H*-indol-3-yl)-5-chloropyrimidin-2-yl)cyclohexane-1,3-amine (**17**) (1.23 g, 2.92 mmol) was dissolved in *N,N*-dimethylformamide (2.0 mL) and added to the solution. The reaction was stirred and left to slowly warmed up to room temperature. After 1h, the resulting mixture was then added dropwise to water (50 mL) and stirred vigorously (>800 rpm). Cold water (50 mL) was then added and the mixture was stirred for 2 hours. The resulting beige precipitate was then filtered, washed with water (100 mL) and dried under vacuum. The desired product (**18**) was obtained as a yellow amorphous solid (1.75 g, 2.43 mmol) 83 % yield, 97% purity.

**LCMS:** M+H (*m/z*) = 721.0, *R*<sub>T</sub> = 1.68 min (5 – 100 % MeCN / 10 mM AmF aq., 3 min)

#### Step 5:

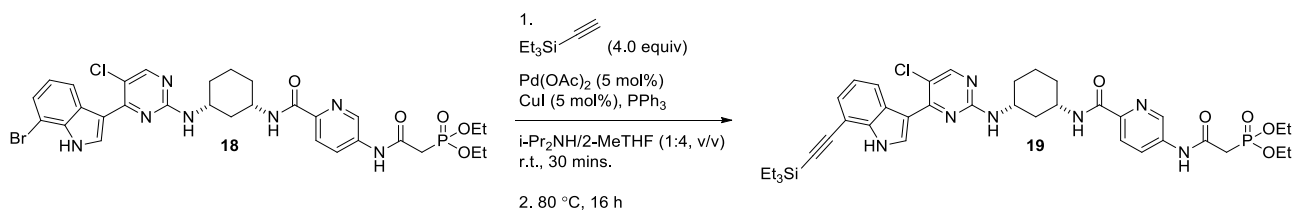

**diethyl (2-((6-(((1*S*,3*R*)-3-((5-chloro-4-(7-((triethylsilyl)ethynyl)-1*H*-indol-3-yl)pyrimidin-2-yl)amino)cyclohexyl)carbamoyl)pyridin-3-yl)amino)-2-oxoethyl)phosphonate (**19**):** To a solution of diethyl (2-((6-(((1*S*,3*R*)-3-((4-(7-bromo-1*H*-indol-3-yl)-5-chloropyrimidin-2-yl)amino)cyclohexyl)carbamoyl)pyridin-3-yl)amino)-2-oxoethyl)phosphonate **18** (500 mg, 0.695 mmol) in *i*Pr<sub>2</sub>NH / THF (1.39 mL, 1:4 v/v) under an nitrogen atmosphere were added catalytic amounts of Cul

(2.7 mg, 5 mol%), Pd(OAc)<sub>2</sub> (7.8 mg, 5 mol%), and triphenylphosphine (45.6 mg, 25 mol%). The solution was stirred for 30 minutes at room temperature, and then triethylsilylethyne (390 mg, 2.78 mmol) was added under vigorous stirring. The reaction mixture was then heated to 80 °C overnight. After being cooled to room temperature, the mixture was filtered, washed with methanol and concentrated under vacuum. The crude mixture was purified by normal phase column chromatography using 0 – 10 % MeOH / dichloromethane as eluent. The product was obtained as a light brown foam (340 mg) containing 8% of starting material. This foam was purified by reverse phase column chromatography (60 g) using 30 – 100 % MeCN / 10 mM AmF aq. Pure fractions were combined, frozen and lyophilized over 2 days. The desired product (**19**) was obtained off-white amorphous solid (320 mg, 0.41 mmol), 99 % purity, 59 % isolated yield.

**LCMS** M+H (*m/z*) = 777.9, R<sub>T</sub> = 2.24 min (5 – 100 % MeCN / 10 mM AmF aq., 3 min)

### Step 6:

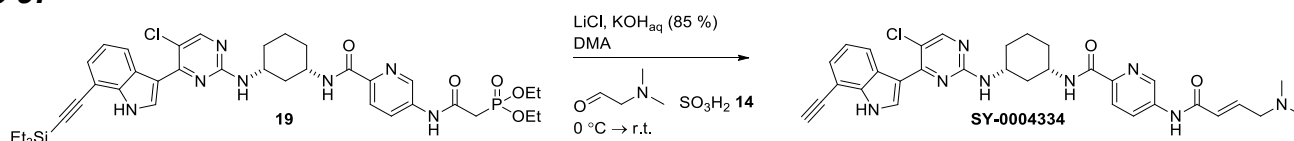

**N-((1S,3R)-3-((5-chloro-4-(7-ethynyl-1H-indol-3-yl)pyrimidin-2-yl)amino)cyclohexyl)-5-((E)-4-(dimethylamino)but-2-enamido)picolinamide (SY-4334)**: To a 10 mL round bottom flask, diethyl ((6-(((1S,3R)-3-((5-chloro-4-(7-((triethylsilyl)ethynyl)-1H-indol-3-yl)pyrimidin-2-yl)amino)cyclohexyl)carbamoyl)pyridin-3-yl)amino)-2-oxoethyl)phosphonate **19** (320 mg, 0.410 mmol) was dissolved *N,N*-dimethylacetamide (4.1 mL). The reaction was stirred under nitrogen atmosphere. To this solution was added lithium chloride monohydrate (19.1 mg, 0.451 mmol) and the solution was stirred until dissolved. To the solution, 85 % KOH in water (1.15 mL, 41.0 mmol) was added and the reaction was left to stir at room temperature. After 15 minutes, 2.3 mL of *N,N*-dimethylaminoacetaldehyde solution in water (0.173 g, 1.02 mmol, 0.52 M) was added dropwise. The reaction was then left to warm to room temperature and was monitored by LCMS until judged complete. The crude solution was then added dropwise to 25 mL of water under vigorous stirring (>500 rpm), filtered, washed with water and dried under vacuum. The crude mixture was then purified via reverse phase column chromatography (25 g) using 10 – 60 % MeCN / 10 mM AmF. The pure fractions were then combined, frozen and lyophilized over two days. The desired product (**SY-4334**) was obtained as an off-white amorphous solid (95 mg, 0.159 mmol), 99 % purity, 39 % isolated yield.

**LCMS** M+H (*m/z*) = 597.0, R<sub>T</sub> = 1.50 min (5 – 100 % MeCN / 10 mM AMF aq., 3 min.)

**<sup>1</sup>H NMR** (400 MHz, DMSO-*d*<sub>6</sub>) δ 12.04 (s, 1H), 10.54 (s, 1H), 8.86 (d, *J* = 2.3 Hz, 1H), 8.81 – 8.57 (m, 1H), 8.52 (d, *J* = 8.6 Hz, 1H), 8.37 (s, 1H), 8.30 – 8.16 (m, 2H), 7.98 (d, *J* = 8.6 Hz, 1H), 7.36 (t, *J* = 7.3 Hz, 2H), 7.31 – 7.08 (m, 1H), 6.78 (dt, *J* = 15.4, 5.7 Hz, 1H), 6.27 (d, *J* = 15.4 Hz, 1H), 4.55 (s, 1H), 4.08 – 3.71 (m, 2H), 3.05 (d, *J* = 5.6 Hz, 2H), 2.15 (s, 6H), 2.02 – 1.72 (m, 3H), 1.62 – 1.11 (m, 4H).
